# Supplementary material
Source: PubMed Central journal article supplement (PMC1626612)
Supplement: plntcell_tpc.106.042713_1.pdf [file plntcell_tpc.106.042713_1.pdf]

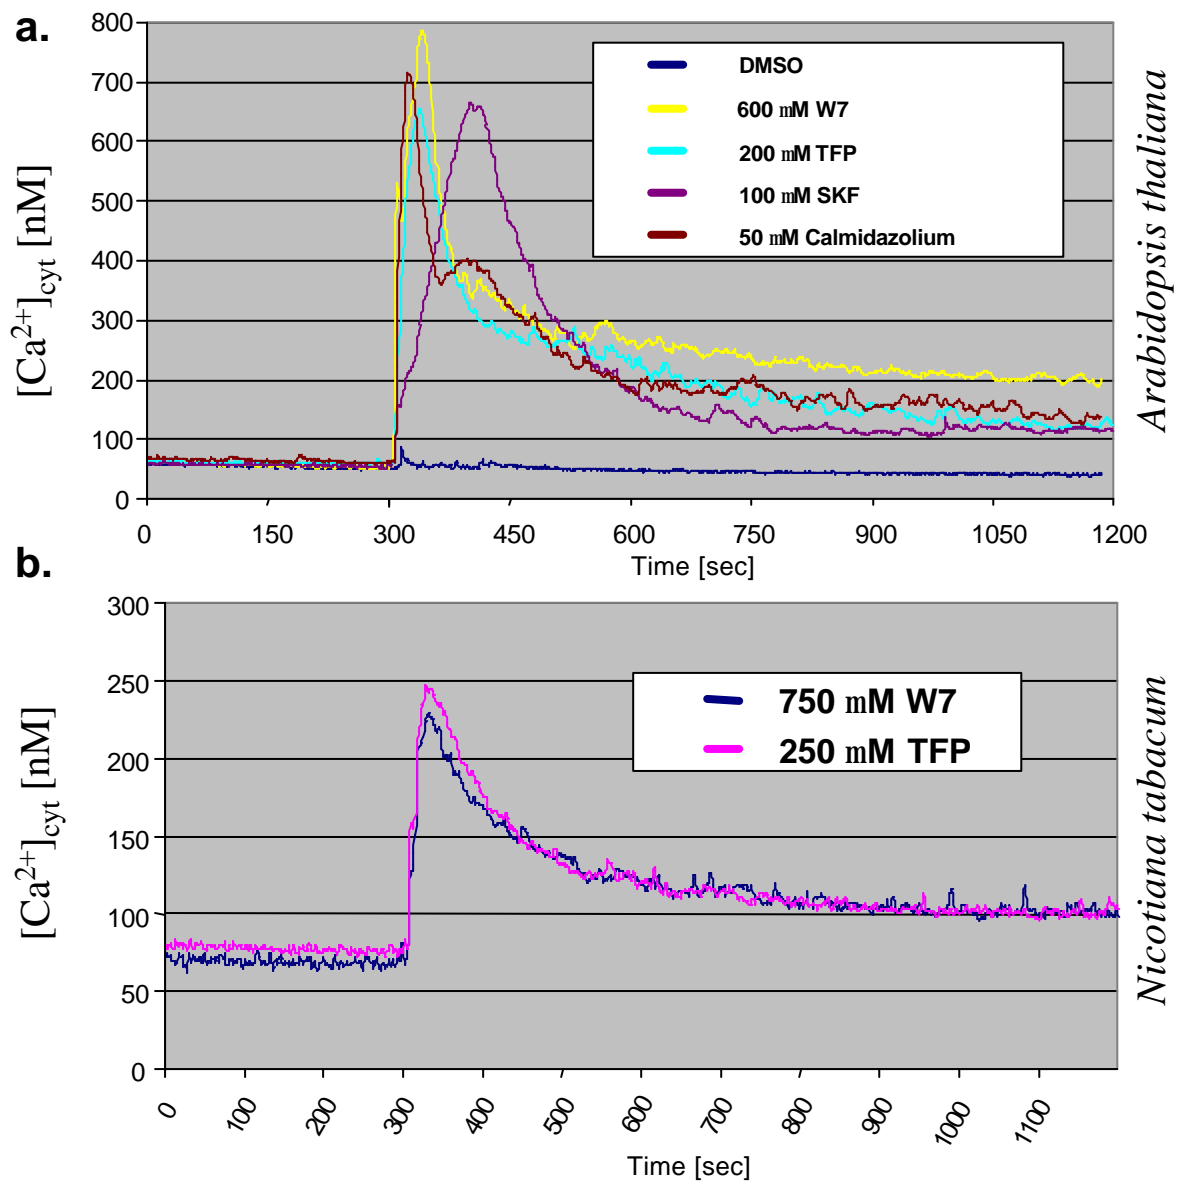

**Supplemental Fig.1. Measurements of  $[Ca^{2+}]_{cyt}$  in response to treatments with the calmodulin antagonists.** Twelve days old *Arabidopsis* (a) and tobacco (b) seedlings expressing aequorin were immersed overnight in 20 nM coelenterazine. For each treatment, eight seedlings were put in a special tube in a dark chamber under the luminometer, and photon counts were taken every second. Photon counts were transformed into cytosolic calcium concentrations as described in Materials and Methods. The different calmodulin antagonists (W7, TFP, SKF and calmidazolium; Materials & Methods) were added 300 seconds after photon recording started (Time = 0). DMSO, the solvent for all antagonists, served as control.
