# Supplementary material
Source: PubMed Central journal article supplement (PMC1626612)
Supplement: plntcell_tpc.106.042713_2.pdf [file plntcell_tpc.106.042713_2.pdf]

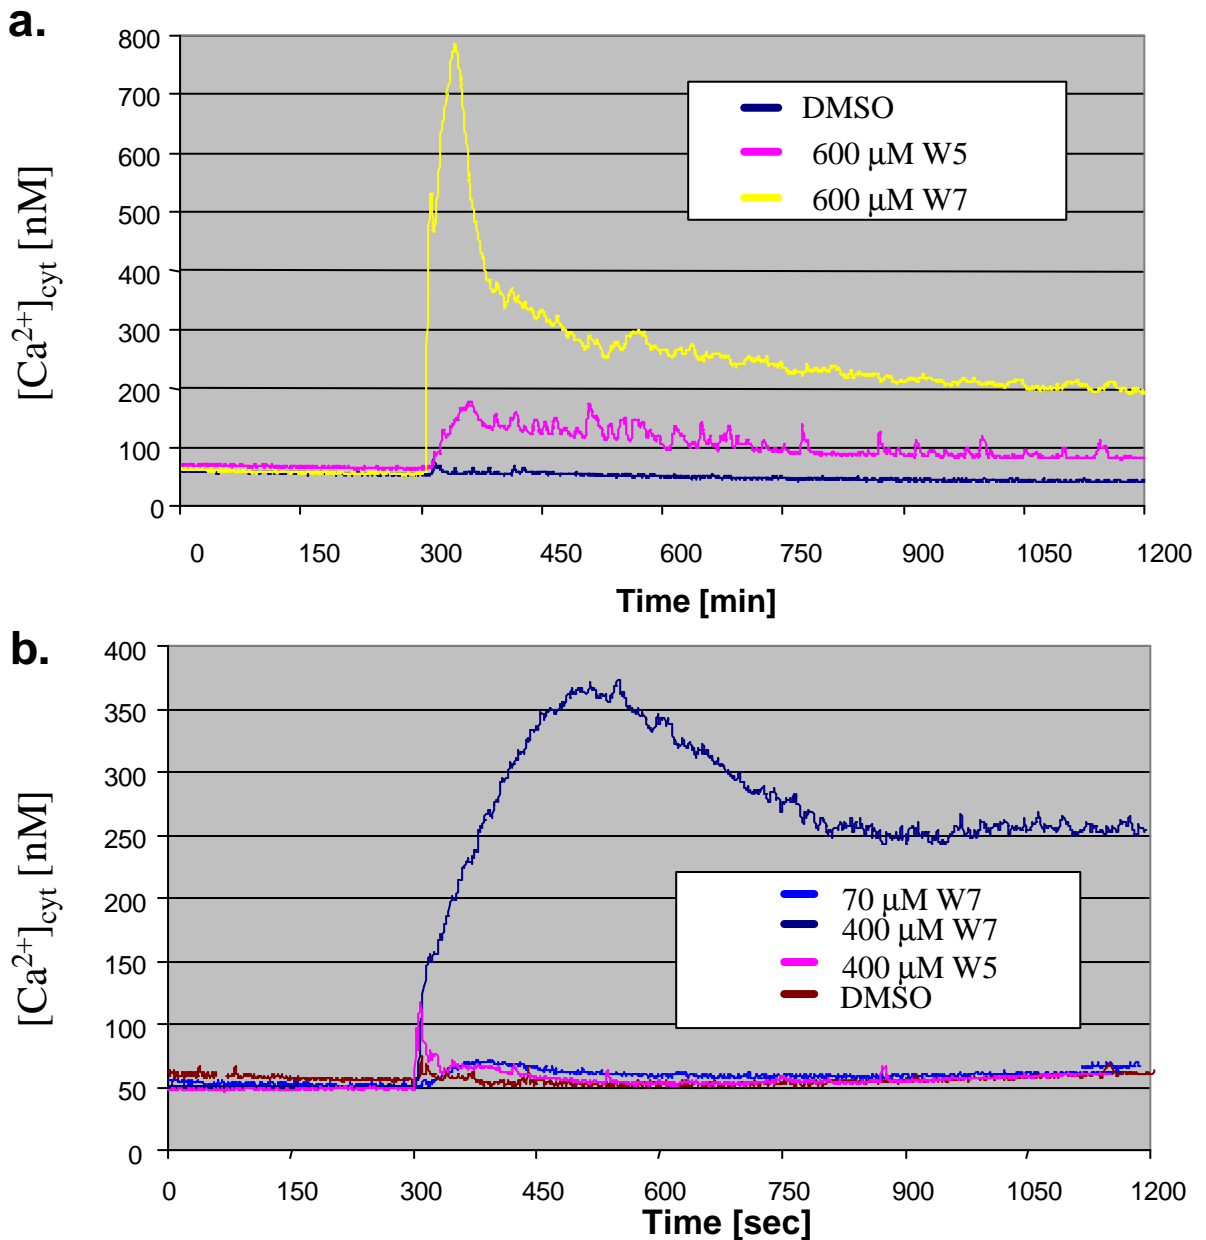

**Supplemental Fig.2. Comparison of Arabidopsis  $[Ca^{2+}]_{cyt}$  burst in response to W7 and its weaker CaM antagonist analogue W5.** Comparison of the  $[Ca^{2+}]_{cyt}$ -induced response following treatment with W7 and its much less efficacious analogue W5 [N-(6-Aminohexyl)-1-naphthalenesulfonamide hydrochloride] was performed at 600  $\mu$ M (a) and 400  $\mu$ M (b). The different analogues (concentrations indicated) were added 300 seconds after photon recording started (Time = 0). DMSO, the solvent for all antagonists, served as control.
