# Supplementary material
Source: PubMed Central journal article supplement (PMC1626612)
Supplement: plntcell_tpc.106.042713_3.pdf [file plntcell_tpc.106.042713_3.pdf]

**Supplementary Table I - W7 induced calcium-responsive upregulated ESTs**

| Loci      | ESTs   | description                                                                        | fold upregulation average TFP/control | standard error TFP/control | fold upregulation average W7/control | standard error W7/control | fold upregulation average W7/W7 - Ca | standard error W7/W7 - Ca | fold upregulation average W7 - Ca/control - Ca | standard error W7 - Ca/control -Ca |
|-----------|--------|------------------------------------------------------------------------------------|---------------------------------------|----------------------------|--------------------------------------|---------------------------|--------------------------------------|---------------------------|------------------------------------------------|------------------------------------|
| AT1G03220 | H76724 | extracellular dermal glycoprotein (EDGP)                                           | 5.07                                  | 0.56                       | 9.34                                 | 2.41                      | 2.32                                 | 0.35                      | 1.36                                           | 0.11                               |
|           | N96972 |                                                                                    | 4.99                                  | 1.01                       | 6.70                                 | 1.53                      | 1.74                                 | 0.43                      | 1.30                                           | 0.18                               |
| AT1G03730 | H37232 | unknown protein                                                                    | 1.87                                  | 0.41                       | 1.97                                 | 0.15                      | 2.21                                 | 0.32                      | 1.17                                           | 0.18                               |
| AT1G03740 | T20464 | cdc2-like protein kinase                                                           | 2.34                                  | 0.41                       | 2.36                                 | 0.57                      | 2.06                                 | 0.21                      | 1.32                                           | 0.06                               |
| AT1G08930 | T22578 | zinc finger protein ATZF1 -ERD6                                                    | 3.56                                  | 0.99                       | 3.63                                 | 0.50                      | 1.73                                 | 0.38                      | 1.34                                           | 0.22                               |
| AT1G09070 | T21700 | Similar to Glycine SRC2                                                            | 3.41                                  | 0.36                       | 4.62                                 | 1.44                      | 2.33                                 | 0.55                      | 1.54                                           | 0.08                               |
| AT1G11530 | R65313 | thioredoxin h                                                                      | 1.46                                  | 0.10                       | 2.38                                 | 0.26                      | 2.38                                 | 0.50                      | 1.04                                           | 0.17                               |
| AT1G18470 | T76213 | unknown protein                                                                    | 1.31                                  | 0.39                       | 1.69                                 | 0.21                      | 1.89                                 | 0.18                      | 1.04                                           | 0.10                               |
| AT1G18570 | T22593 | myb51 - R2R3 myb like transcription factor                                         | 4.92                                  | 1.15                       | 6.84                                 | 0.46                      | 3.13                                 | 0.54                      | 1.68                                           | 0.25                               |
| AT1G19180 | T42340 | unknown protein                                                                    | 5.35                                  | 1.47                       | 11.72                                | 2.47                      | 3.21                                 | 0.49                      | 1.57                                           | 0.34                               |
| AT1G20440 | N96946 | COR47 - ERD10                                                                      | 1.76                                  | 0.59                       | 5.39                                 | 1.44                      | 4.81                                 | 1.56                      | 1.31                                           | 0.08                               |
| AT1G21110 | T75823 | O-methyltransferase 1, putative                                                    | 4.22                                  | 0.99                       | 5.72                                 | 1.51                      | 3.59                                 | 1.17                      | 1.50                                           | 0.21                               |
| AT1G21730 | N38368 | kinesin-related protein                                                            | 2.10                                  | 0.05                       | 2.08                                 | 0.13                      | 1.78                                 | 0.31                      | 1.00                                           | 0.09                               |
| AT1G22360 | W43072 | UDP-glucose glucosyltransferase                                                    | 2.05                                  | 0.34                       | 2.61                                 | 0.50                      | 1.51                                 | 0.20                      | 1.02                                           | 0.09                               |
| AT1G23490 | T46050 | putative ADP-ribosylation factor - RAB GTPase                                      | 1.48                                  | 0.29                       | 1.55                                 | 0.26                      | 2.09                                 | 0.16                      | 1.04                                           | 0.11                               |
| AT1G27130 | T42273 | GST12                                                                              | 1.84                                  | 0.10                       | 2.39                                 | 0.24                      | 1.74                                 | 0.42                      | 0.94                                           | 0.04                               |
| AT1G27730 | R29923 | ZAT10 - salt induced zinc finger protein                                           | 5.34                                  | 0.35                       | 8.60                                 | 0.53                      | 2.63                                 | 0.29                      | 2.17                                           | 0.45                               |
|           | R90419 |                                                                                    | 4.86                                  | 1.71                       | 5.79                                 | 1.14                      | 2.31                                 | 0.65                      | 1.79                                           | 0.34                               |
| AT1G28380 | R30143 | unknown protein                                                                    | 1.65                                  | 0.24                       | 1.79                                 | 0.29                      | 2.29                                 | 0.37                      | 1.05                                           | 0.04                               |
| AT1G30360 | W43679 | unknown protein                                                                    | 1.14                                  | 0.07                       | 1.67                                 | 0.21                      | 1.96                                 | 0.21                      | 1.04                                           | 0.12                               |
| AT1G31130 | T20423 | unknown protein                                                                    | 3.26                                  | 0.48                       | 2.92                                 | 0.37                      | 2.60                                 | 0.17                      | 1.41                                           | 0.18                               |
| AT1G33600 | T20493 | LRR protein family                                                                 | 2.62                                  | 0.83                       | 2.45                                 | 0.84                      | 2.20                                 | 0.30                      | 1.25                                           | 0.09                               |
| AT1G35140 | H37666 | phi1 - phosphate induced protein                                                   | 2.39                                  | 0.55                       | 2.29                                 | 0.04                      | 1.57                                 | 0.22                      | 0.91                                           | 0.12                               |
| AT1G36310 | R65236 | unknown protein                                                                    | 2.26                                  | 0.58                       | 2.46                                 | 0.09                      | 2.03                                 | 0.18                      | 1.06                                           | 0.09                               |
| AT1G36580 | T43614 | unknown protein                                                                    | 4.86                                  | 2.01                       | 6.01                                 | 0.50                      | 3.17                                 | 0.22                      | 1.20                                           | 0.31                               |
| AT1G42990 | N97053 | bZIP family transcription factor                                                   | 3.41                                  | 0.55                       | 3.28                                 | 0.47                      | 2.01                                 | 0.10                      | 0.89                                           | 0.08                               |
|           | T88194 |                                                                                    | 4.43                                  | 1.19                       | 3.13                                 | 0.54                      | 1.61                                 | 0.24                      | 1.06                                           | 0.15                               |
| AT1G47380 | T44777 | protein phosphatase 2C (PP2C) -related                                             | 1.52                                  | 0.12                       | 1.79                                 | 0.17                      | 2.05                                 | 0.31                      | 1.03                                           | 0.06                               |
| AT1G49480 | T21005 | expressed protein                                                                  | 1.13                                  | 0.15                       | 2.17                                 | 0.48                      | 1.95                                 | 0.17                      | 1.08                                           | 0.17                               |
| AT1G51805 | T20591 | LRR protein kinase, putative, similar to light repressible receptor protein kinase | 1.42                                  | 0.14                       | 1.92                                 | 0.13                      | 1.70                                 | 0.07                      | 1.16                                           | 0.02                               |
| AT1G52890 | N65888 | unknown protein                                                                    | 2.01                                  | 0.09                       | 2.85                                 | 0.28                      | 1.87                                 | 0.09                      | 1.24                                           | 0.25                               |
| AT1G55450 | T76836 | similar to embryo-abundant protein                                                 | 2.50                                  | 0.30                       | 3.07                                 | 0.58                      | 1.68                                 | 0.46                      | 1.22                                           | 0.06                               |
| AT1G55670 | T43953 | putative photosystem I subunit V precursor                                         | 2.08                                  | 0.19                       | 2.58                                 | 0.18                      | 1.89                                 | 0.09                      | 1.22                                           | 0.12                               |
| AT1G55810 | T46383 | uracil phosphoribosyltransferase                                                   | 5.03                                  | 1.00                       | 6.14                                 | 1.45                      | 1.69                                 | 0.26                      | 1.33                                           | 0.26                               |
| AT1G59820 | N96155 | similar to Potential phospholipid-transporting ATPase                              | 1.37                                  | 0.06                       | 1.92                                 | 0.21                      | 2.57                                 | 0.48                      | 1.02                                           | 0.13                               |
| AT1G59870 | H37610 | ABC transporter family protein                                                     | 3.95                                  | 0.75                       | 4.25                                 | 0.80                      | 2.05                                 | 0.44                      | 1.23                                           | 0.22                               |
| AT1G62660 | W43492 | glycosyl hydrolase family 32, identical to beta-fructosidase                       | 1.65                                  | 0.26                       | 2.24                                 | 0.11                      | 1.92                                 | 0.40                      | 0.99                                           | 0.14                               |
| AT1G62870 | R30034 | unknown protein                                                                    | 4.99                                  | 0.52                       | 7.49                                 | 0.72                      | 3.08                                 | 0.31                      | 2.45                                           | 0.36                               |
| AT1G65310 | N37583 | xyloglucan endotransglycosylase TCH4-like                                          | 2.57                                  | 0.10                       | 3.57                                 | 0.92                      | 2.34                                 | 0.22                      | 1.20                                           | 0.15                               |

|           |                    |                                                                         |              |              |              |              |              |              |              |              |
|-----------|--------------------|-------------------------------------------------------------------------|--------------|--------------|--------------|--------------|--------------|--------------|--------------|--------------|
| AT1G66260 | T45888             | export factor RNA binding protein, putative                             | 1.91         | 0.23         | 2.29         | 0.40         | 2.08         | 0.34         | 1.10         | 0.07         |
| AT1G69080 | N38009             | unknown protein                                                         | 2.16         | 0.19         | 2.05         | 0.25         | 1.82         | 0.34         | 1.10         | 0.02         |
| AT1G69840 | R90080             | unknown protein                                                         | 3.50         | 0.86         | 4.39         | 0.77         | 2.66         | 0.50         | 1.17         | 0.11         |
| AT1G69890 | N37850             | unknown protein                                                         | 3.81         | 1.30         | 4.04         | 0.88         | 2.27         | 0.62         | 1.55         | 0.17         |
| AT1G70090 | N38288             | glycosyltransferase family 8                                            | 2.14         | 0.29         | 4.17         | 0.32         | 2.97         | 0.51         | 1.01         | 0.11         |
| AT1G72450 | T44776             | unknown protein                                                         | 1.34         | 0.19         | 1.80         | 0.22         | 1.96         | 0.24         | 1.08         | 0.15         |
| AT1G72910 | R29891             | disease resistance protein (TIR-NBS class), putative                    | 3.08         | 0.22         | 3.11         | 0.52         | 1.74         | 0.59         | 1.37         | 0.03         |
| AT1G72930 | N65692             | TIR - TOLL/INTERLEUKIN-1 RECEPTOR-LIKE                                  | 4.10         | 0.73         | 6.00         | 0.66         | 2.74         | 0.20         | 0.93         | 0.05         |
| AT1G73540 | T44808             | contains similarity to diphosphoinositol polyphosphate phosphohydrolase | 5.92         | 1.92         | 5.30         | 1.50         | 4.24         | 2.17         | 1.43         | 0.08         |
| AT1G74100 | T44722             | putative flavonol sulfotransferase                                      | 3.37         | 0.66         | 5.85         | 2.31         | 4.23         | 1.16         | 1.29         | 0.22         |
| AT1G74950 | R65457             | unknown protein                                                         | 2.91         | 0.58         | 3.20         | 0.12         | 1.77         | 0.07         | 1.28         | 0.25         |
| AT1G76180 | T41665             | dehydrin, putative                                                      | 1.12         | 0.15         | 2.07         | 0.96         | 1.90         | 0.08         | 1.15         | 0.17         |
| AT1G76680 | T44208             | 12-oxophytodiene reductase (OPR1)                                       | 4.69         | 1.68         | 12.37        | 5.73         | 3.36         | 1.06         | 1.60         | 0.08         |
| AT1G78850 | W43262             | curculin-like (mannose-binding) lectin family                           | 2.88         | 0.03         | 2.67         | 0.24         | 2.30         | 0.65         | 0.99         | 0.08         |
| AT1G79900 | T46024             | mitochondrial carrier protein family                                    | 3.78         | 0.05         | 3.09         | 0.26         | 2.15         | 0.37         | 1.31         | 0.21         |
| AT2G01270 | T22047             | thioredoxin                                                             | 1.55         | 0.06         | 2.65         | 0.63         | 2.81         | 0.21         | 1.20         | 0.12         |
| AT2G01450 | N96333             | ATMPK17 - mitogen-activated protein kinase                              | 1.99         | 0.54         | 2.34         | 0.33         | 1.54         | 0.12         | 1.00         | 0.10         |
| AT2G01670 | T20807             | unknown protein                                                         | 2.52         | 0.55         | 1.98         | 0.34         | 2.21         | 0.04         | 1.16         | 0.07         |
| AT2G05710 | T44218             | cytoplasmic aconitate hydratase                                         | 2.81         | 0.26         | 3.26         | 0.82         | 3.07         | 0.38         | 1.21         | 0.16         |
| AT2G05940 | H76238             | putative protein kinase                                                 | 10.86        | 2.03         | 7.28         | 2.52         | 3.03         | 0.65         | 1.87         | 0.50         |
| AT2G16530 | T21016             | expressed protein                                                       | 1.08         | 0.12         | 2.14         | 0.47         | 1.84         | 0.14         | 1.09         | 0.18         |
| AT2G17840 | T43413             | putative senescence-associated protein 12                               | 1.48         | 0.26         | 2.47         | 0.79         | 4.29         | 1.38         | 1.21         | 0.36         |
| AT2G20240 | N96062             | unknown protein                                                         | 2.63         | 0.45         | 2.72         | 0.20         | 1.84         | 0.08         | 1.39         | 0.16         |
| AT2G20810 | N65415             | unknown protein                                                         | 1.45         | 0.12         | 2.13         | 0.19         | 1.53         | 0.30         | 1.06         | 0.20         |
| AT2G22500 | AA067581<br>T44564 | mitochondrial carrier protein family                                    | 4.16<br>2.87 | 1.08<br>0.62 | 3.43<br>2.85 | 0.30<br>0.38 | 2.80<br>2.62 | 0.24<br>0.34 | 1.33<br>1.26 | 0.11<br>0.08 |
| AT2G23120 | T21007             | unknown protein                                                         | 1.94         | 0.42         | 7.77         | 3.52         | 4.41         | 0.37         | 1.23         | 0.22         |
| AT2G23810 | N97214             | unknown protein                                                         | 1.62         | 0.29         | 3.92         | 0.95         | 2.44         | 0.55         | 1.26         | 0.10         |
| AT2G26190 | H76031<br>R90092   | unknown protein                                                         | 1.86<br>1.47 | 0.04<br>0.22 | 2.31<br>2.34 | 0.13<br>0.25 | 1.67<br>2.34 | 0.13<br>0.16 | 1.24<br>0.89 | 0.07<br>0.03 |
| AT2G28840 | T22042             | putative RING zinc finger ankyrin protein                               | 2.25         | 0.38         | 1.96         | 0.30         | 2.14         | 0.14         | 1.27         | 0.14         |
| AT2G29960 | T46293             | cyclophilin                                                             | 1.77         | 0.32         | 2.07         | 0.49         | 2.25         | 0.39         | 1.15         | 0.13         |
| AT2G30470 | T22510             | transcriptional factor B3 family                                        | 4.98         | 0.33         | 6.97         | 0.90         | 5.28         | 0.28         | 1.20         | 0.05         |
| AT2G30740 | T76002             | serine/threonine protein kinase                                         | 3.36         | 0.37         | 3.62         | 0.57         | 2.40         | 0.46         | 1.26         | 0.22         |
| AT2G30870 | R65251<br>T43250   | GST - ERD13                                                             | 1.39<br>1.55 | 0.24<br>0.04 | 2.91<br>2.95 | 0.58<br>0.53 | 2.54<br>3.11 | 0.51<br>0.81 | 1.14<br>1.05 | 0.18<br>0.11 |
| AT2G32240 | H76467<br>W43372   | myosin heavy chain -related                                             | 2.48<br>1.94 | 0.71<br>0.37 | 2.99<br>2.12 | 0.29<br>0.18 | 2.72<br>2.13 | 0.52<br>0.09 | 1.07<br>0.96 | 0.19<br>0.16 |
| AT2G39770 | AA067512           | GDP-mannose pyrophosphorylase                                           | 1.41         | 0.14         | 3.64         | 1.78         | 3.41         | 0.41         | 1.15         | 0.11         |
| AT2G40000 | N65731<br>R90434   | nematode-resistance protein -related                                    | 3.91<br>3.63 | 1.26<br>0.22 | 5.99<br>3.04 | 1.21<br>0.28 | 2.43<br>1.87 | 0.58<br>0.35 | 1.43<br>1.21 | 0.08<br>0.06 |
| AT2G40140 | T43596             | CCCH-type zinc finger protein -related, also an ankyrin-repeat protein  | 10.78        | 2.02         | 11.95        | 0.62         | 4.86         | 0.48         | 2.06         | 0.46         |

|           |                                                              |                                                                          |                                              |                                              |                                              |                                              |                                              |                                              |                                              |                                              |
|-----------|--------------------------------------------------------------|--------------------------------------------------------------------------|----------------------------------------------|----------------------------------------------|----------------------------------------------|----------------------------------------------|----------------------------------------------|----------------------------------------------|----------------------------------------------|----------------------------------------------|
| AT2G41100 | N38224<br>N97207                                             | ATCAL5 - TCH3 -CaM related protein                                       | 6.06<br>4.69                                 | 0.62<br>0.82                                 | 12.58<br>12.12                               | 3.88<br>3.25                                 | 3.03<br>3.83                                 | 0.08<br>0.14                                 | 1.45<br>1.54                                 | 0.19<br>0.31                                 |
| AT2G41110 | H77078                                                       | ATCAL4                                                                   | 1.78                                         | 0.18                                         | 2.21                                         | 0.18                                         | 1.60                                         | 0.19                                         | 1.17                                         | 0.08                                         |
| AT2G41430 | AA042759<br>AA067594<br>N38398<br>R90595<br>T76301<br>W43612 | ERD15                                                                    | 2.21<br>1.98<br>1.60<br>1.38<br>2.13<br>2.57 | 0.30<br>0.20<br>0.15<br>0.25<br>0.38<br>0.48 | 2.98<br>2.04<br>1.94<br>2.67<br>2.48<br>2.32 | 0.85<br>0.56<br>0.25<br>0.19<br>0.53<br>0.55 | 2.11<br>2.56<br>2.02<br>3.30<br>1.92<br>2.77 | 0.28<br>0.17<br>0.18<br>0.56<br>0.05<br>0.32 | 1.35<br>1.19<br>1.02<br>1.17<br>1.20<br>1.20 | 0.11<br>0.06<br>0.07<br>0.20<br>0.03<br>0.07 |
| AT2G41640 | N64958<br>T44801                                             | unknown protein                                                          | 1.72<br>2.22                                 | 0.43<br>0.36                                 | 2.26<br>1.67                                 | 0.27<br>0.47                                 | 1.76<br>1.78                                 | 0.34<br>0.14                                 | 1.16<br>1.16                                 | 0.14<br>0.09                                 |
| AT2G45300 | T43742                                                       | 5-enolpyruvylshikimate-3-phosphate (EPSP) synthase                       | 1.07                                         | 0.18                                         | 1.92                                         | 0.07                                         | 1.78                                         | 0.46                                         | 1.23                                         | 0.16                                         |
| AT2G45820 | T76318<br>W43082                                             | remorin - a non-specific DNA binding protein                             | 1.23<br>1.10                                 | 0.05<br>0.02                                 | 2.78<br>3.08                                 | 1.21<br>1.21                                 | 2.14<br>2.77                                 | 0.12<br>0.50                                 | 1.26<br>1.17                                 | 0.05<br>0.05                                 |
| AT2G46330 | T46678                                                       | arabinogalactan-protein (AGP16)                                          | 2.79                                         | 1.12                                         | 2.07                                         | 0.25                                         | 1.60                                         | 0.42                                         | 1.32                                         | 0.08                                         |
| AT3G02880 | T43104                                                       | leucine-rich repeat transmembrane protein kinase                         | 1.79                                         | 0.24                                         | 2.31                                         | 0.29                                         | 1.61                                         | 0.12                                         | 0.98                                         | 0.08                                         |
| AT3G05320 | R30381                                                       | unknown protein                                                          | 1.40                                         | 0.39                                         | 1.93                                         | 0.08                                         | 1.92                                         | 0.49                                         | 0.95                                         | 0.09                                         |
| AT3G07180 | R90439                                                       | unknown protein                                                          | 3.64                                         | 1.22                                         | 6.54                                         | 1.37                                         | 3.34                                         | 0.56                                         | 1.34                                         | 0.17                                         |
| AT3G07780 | W43216                                                       | unknown protein                                                          | 1.20                                         | 0.13                                         | 2.11                                         | 0.33                                         | 2.84                                         | 0.47                                         | 1.08                                         | 0.32                                         |
| AT3G11820 | R90507                                                       | SYPI21 - syntaxin-related protein                                        | 2.99                                         | 0.34                                         | 3.48                                         | 0.28                                         | 2.21                                         | 0.30                                         | 1.00                                         | 0.13                                         |
| AT3G15210 | T76090                                                       | ethylene responsive element binding factor 4 (AtERF4)                    | 2.82                                         | 0.43                                         | 2.67                                         | 0.37                                         | 2.18                                         | 0.52                                         | 1.16                                         | 0.15                                         |
| AT3G15356 | T43774                                                       | similar to putative lectin                                               | 2.47                                         | 0.28                                         | 5.20                                         | 1.66                                         | 3.61                                         | 2.19                                         | 1.39                                         | 0.21                                         |
| AT3G16530 | T75902                                                       | putative lectin                                                          | 2.99                                         | 0.92                                         | 7.50                                         | 2.57                                         | 3.69                                         | 1.75                                         | 1.34                                         | 0.04                                         |
| AT3G16720 | N38413                                                       | ATL2 - RING zinc finger protein                                          | 2.94                                         | 0.28                                         | 3.09                                         | 0.24                                         | 1.95                                         | 0.13                                         | 1.40                                         | 0.24                                         |
| AT3G17390 | AA041124                                                     | MTO3 - s-adenosylmethionine synthetase-related - methionine biosynthesis | 1.86                                         | 0.47                                         | 2.62                                         | 0.45                                         | 2.42                                         | 0.44                                         | 0.97                                         | 0.02                                         |
| AT3G17650 | R90414                                                       | unknown protein                                                          | 3.10                                         | 0.80                                         | 3.58                                         | 0.78                                         | 2.02                                         | 0.31                                         | 1.51                                         | 0.20                                         |
| AT3G19260 | T21493                                                       | LAG1 HOMOLOG 2, LONGEVITY ASSURANCE GENE1                                | 1.84                                         | 0.14                                         | 3.53                                         | 0.69                                         | 2.43                                         | 0.13                                         | 1.11                                         | 0.14                                         |
| AT3G23030 | T44815                                                       | auxin-inducible gene (IAA2)                                              | 1.50                                         | 0.26                                         | 1.80                                         | 0.10                                         | 1.71                                         | 0.23                                         | 1.06                                         | 0.15                                         |
| AT3G26980 | H77004                                                       | similar to geranylgeranylated proteins ATGP4                             | 2.61                                         | 0.27                                         | 2.13                                         | 0.74                                         | 1.81                                         | 0.03                                         | 0.94                                         | 0.12                                         |
| AT3G29170 | H76592                                                       | unknown protein                                                          | 0.98                                         | 0.23                                         | 1.61                                         | 0.30                                         | 2.00                                         | 0.28                                         | 0.99                                         | 0.11                                         |
| AT3G29360 | R30251                                                       | UDP-glucose dehydrogenase-related                                        | 1.18                                         | 0.19                                         | 1.80                                         | 0.16                                         | 1.85                                         | 0.12                                         | 1.08                                         | 0.04                                         |
| AT3G44720 | N96696<br>T42435                                             | prephenate dehydratase family, similar to bacterial PheA gene products   | 4.89<br>5.45                                 | 0.16<br>0.96                                 | 6.71<br>6.01                                 | 1.98<br>1.53                                 | 2.75<br>1.57                                 | 0.29<br>0.40                                 | 1.45<br>1.47                                 | 0.16<br>0.18                                 |
| AT3G45640 | N65559                                                       | mitogen-activated protein kinase 3                                       | 2.99                                         | 0.39                                         | 3.22                                         | 0.20                                         | 2.69                                         | 0.65                                         | 1.44                                         | 0.27                                         |
| AT3G51550 | R64794                                                       | receptor-protein kinase-like protein                                     | 4.39                                         | 1.47                                         | 3.06                                         | 0.65                                         | 4.16                                         | 2.02                                         | 1.15                                         | 0.05                                         |
| AT3G52800 | T41958                                                       | zinc finger - like protein                                               | 2.69                                         | 0.40                                         | 2.97                                         | 0.37                                         | 1.71                                         | 0.28                                         | 1.42                                         | 0.03                                         |
| AT3G54770 | AA067387                                                     | contains RNA recognition motif                                           | 1.46                                         | 0.17                                         | 2.10                                         | 0.13                                         | 2.26                                         | 0.65                                         | 1.28                                         | 0.10                                         |
| AT3G55430 | N97124                                                       | glycosyl hydrolase family 17 -beta 1,3 glucanase                         | 3.44                                         | 0.16                                         | 3.86                                         | 0.80                                         | 1.64                                         | 0.45                                         | 1.06                                         | 0.03                                         |
| AT3G55980 | T22041                                                       | PEI1- CCCH zinc finger transcription factor                              | 12.14                                        | 1.16                                         | 21.17                                        | 1.34                                         | 8.35                                         | 0.73                                         | 1.62                                         | 0.05                                         |
| AT3G56800 | N38696                                                       | calmodulin like                                                          | 1.49                                         | 0.07                                         | 2.22                                         | 0.24                                         | 1.81                                         | 0.25                                         | 1.11                                         | 0.04                                         |

|           |          |                                                                      |      |      |       |      |      |      |      |      |
|-----------|----------|----------------------------------------------------------------------|------|------|-------|------|------|------|------|------|
| AT3G56880 | N37725   | unknown protein                                                      | 1.66 | 0.31 | 2.25  | 0.22 | 1.58 | 0.11 | 1.14 | 0.20 |
| AT3G57530 | N96364   | CDPK                                                                 | 2.01 | 0.19 | 3.15  | 0.39 | 2.30 | 0.24 | 1.48 | 0.27 |
| AT3G58510 | T44044   | DEAD BOX PROTEIN 3 (RNA HELICASE-LIKE PROTEIN)                       | 4.35 | 0.91 | 2.12  | 0.23 | 1.62 | 0.39 | 1.11 | 0.06 |
| AT3G59350 | H36060   | protein kinase-like protein - Pto kinase interactor 1                | 2.19 | 0.53 | 2.40  | 0.47 | 1.55 | 0.36 | 1.01 | 0.12 |
| AT3G60220 | R89979   | RING-H2 zinc finger protein ATL4                                     | 1.24 | 0.34 | 1.87  | 0.25 | 2.34 | 0.21 | 1.02 | 0.06 |
| AT3G62680 | R90421   | proline-rich protein                                                 | 4.03 | 1.12 | 4.66  | 0.68 | 2.88 | 0.95 | 1.52 | 0.25 |
| AT4G02380 | H37120   | ERD1 - SAG21 -clp protease                                           | 2.65 | 0.81 | 3.08  | 0.80 | 2.15 | 0.11 | 1.16 | 0.08 |
| AT4G17490 | T43246   | ethylene-responsive element binding factor(ATERF6)                   | 6.33 | 0.77 | 6.35  | 0.52 | 1.94 | 0.28 | 2.57 | 0.85 |
| AT4G17500 | T42394   | ATERF-1, ETHYLENE RESPONSIVE ELEMENT BINDING FACTOR 1                | 2.92 | 0.54 | 2.56  | 0.30 | 1.66 | 0.25 | 1.27 | 0.07 |
| AT4G21850 | T75897   | unknown protein                                                      | 4.52 | 1.72 | 5.62  | 0.93 | 2.16 | 1.00 | 1.42 | 0.23 |
| AT4G22710 | N65907   | CYP706A2 - cytochrome p450                                           | 8.90 | 1.21 | 9.33  | 0.54 | 2.58 | 0.16 | 1.47 | 0.34 |
|           | T21057   |                                                                      | 8.34 | 1.77 | 7.31  | 1.34 | 2.91 | 0.18 | 1.67 | 0.39 |
|           | T46193   |                                                                      | 3.59 | 0.05 | 3.24  | 0.18 | 2.16 | 0.44 | 1.31 | 0.21 |
|           | T46392   |                                                                      | 4.58 | 0.75 | 4.75  | 0.84 | 2.22 | 0.28 | 1.35 | 0.23 |
| AT4G24160 | T76500   | unknown protein                                                      | 2.49 | 0.45 | 3.23  | 0.74 | 1.80 | 0.33 | 1.53 | 0.19 |
| AT4G24570 | T76263   | mitochondrial carrier protein family                                 | 8.38 | 3.16 | 5.64  | 2.80 | 4.04 | 0.68 | 1.60 | 0.36 |
| AT4G25030 | N65831   | unknown protein                                                      | 2.01 | 0.09 | 3.04  | 0.28 | 2.07 | 0.34 | 1.11 | 0.03 |
|           | T41814   |                                                                      | 2.67 | 0.35 | 2.83  | 0.27 | 2.13 | 0.42 | 1.42 | 0.32 |
| AT4G30530 | T43728   | component of aniline dioxygenase                                     | 4.94 | 0.21 | 4.05  | 1.63 | 2.31 | 0.15 | 0.96 | 0.25 |
| AT4G31500 | T20600   | CYP83B1, CYTOCHROME P450 MONOOXYGENASE                               | 1.77 | 0.30 | 2.14  | 0.32 | 1.70 | 0.28 | 1.21 | 0.13 |
|           | T76397   |                                                                      | 2.01 | 0.62 | 2.32  | 0.05 | 2.22 | 0.46 | 1.17 | 0.08 |
| AT4G32020 | T75628   | unknown protein                                                      | 2.18 | 0.05 | 2.30  | 0.38 | 1.57 | 0.16 | 1.16 | 0.12 |
| AT4G33070 | N97215   | pyruvate decarboxylase-1 (Pdc1)                                      | 3.36 | 2.17 | 1.81  | 0.44 | 2.06 | 0.17 | 1.03 | 0.12 |
| AT4G35480 | T45602   | RING-H2 finger protein RHA3b                                         | 2.87 | 1.01 | 4.29  | 0.95 | 2.38 | 0.22 | 1.19 | 0.27 |
| AT4G36500 | N97118   | unknown protein                                                      | 2.54 | 0.45 | 2.56  | 0.38 | 2.90 | 1.04 | 1.43 | 0.13 |
|           | T43539   |                                                                      | 3.79 | 1.16 | 7.70  | 0.77 | 4.23 | 0.95 | 1.26 | 0.32 |
| AT4G38550 | R65028   | Phospholipase like protein-pEARLI 4                                  | 2.27 | 0.25 | 3.23  | 0.56 | 2.21 | 0.36 | 1.20 | 0.18 |
| AT4G39670 | R30050   | unknown protein                                                      | 3.87 | 0.60 | 3.98  | 0.19 | 2.95 | 0.52 | 1.33 | 0.17 |
| AT4G39940 | T42885   | adenosine-5-phosphosulfate-kinase                                    | 2.92 | 0.59 | 2.77  | 0.36 | 2.86 | 0.71 | 1.35 | 0.19 |
| AT4G39950 | T42902   | cytochrome P450                                                      | 3.07 | 0.74 | 4.78  | 0.80 | 3.65 | 0.94 | 1.55 | 0.39 |
| AT5G03210 | W43163   | putative protein                                                     | 3.53 | 0.56 | 2.30  | 0.36 | 1.52 | 0.15 | 1.23 | 0.09 |
| AT5G03380 | T20408   | similar to farnesylated protein ATFP2                                | 2.62 | 0.34 | 2.10  | 0.59 | 1.81 | 0.12 | 1.23 | 0.07 |
| AT5G03530 | AA042493 | unknown protein - RAB GTPase                                         | 2.06 | 0.34 | 2.17  | 0.35 | 1.72 | 0.30 | 1.13 | 0.12 |
| AT5G05730 | N65620   | ASA1 - ANTHRANILATE SYNTHASE ALPHA SUBUNIT - tryptophan biosynthesis | 2.49 | 0.45 | 2.65  | 0.38 | 1.70 | 0.17 | 1.01 | 0.19 |
| AT5G06320 | H37034   | NDR1/HIN1-like protein 3 (NHL3)                                      | 7.32 | 0.91 | 12.81 | 5.49 | 2.50 | 0.56 | 1.41 | 0.14 |
| AT5G09850 | T43948   | unknown protein                                                      | 2.50 | 0.37 | 1.68  | 0.15 | 1.88 | 0.17 | 1.18 | 0.11 |
| AT5G11670 | N65762   | NADP dependent malic enzyme - like protein                           | 3.16 | 0.32 | 3.87  | 0.05 | 1.94 | 0.22 | 1.14 | 0.14 |
| AT5G11740 | N97068   | AGP15 - ARABINOGALACTAN PROTEIN                                      | 2.37 | 0.77 | 2.74  | 0.59 | 2.08 | 0.31 | 0.97 | 0.04 |
| AT5G13420 | N38293   | transaldolase - like protein - suger metabolism                      | 2.93 | 1.11 | 8.01  | 1.47 | 6.29 | 1.72 | 1.36 | 0.12 |

|           |          |                                                              |      |      |      |      |      |      |      |      |
|-----------|----------|--------------------------------------------------------------|------|------|------|------|------|------|------|------|
| AT5G13650 | T44050   | GTP-binding protein typA (tyrosine phosphorylated protein A) | 1.94 | 0.13 | 1.80 | 0.21 | 1.85 | 0.06 | 1.26 | 0.06 |
| AT5G14930 | N37740   | leaf senescence-associated gene SAG101                       | 1.40 | 0.25 | 2.02 | 0.20 | 1.76 | 0.18 | 0.93 | 0.02 |
| AT5G15970 | T21841   | cold-regulated protein COR6.6 (KIN2)                         | 2.84 | 1.48 | 2.47 | 1.01 | 6.31 | 1.38 | 1.14 | 0.47 |
| AT5G18400 | T43145   | unknown protein                                              | 4.02 | 0.56 | 7.32 | 2.09 | 2.45 | 0.53 | 1.18 | 0.08 |
| AT5G24140 | T44667   | squalene monooxygenase 2                                     | 2.57 | 0.20 | 3.39 | 0.14 | 2.72 | 0.11 | 1.18 | 0.14 |
| AT5G24300 | T22050   | strach synthase                                              | 2.49 | 0.31 | 4.22 | 0.35 | 3.36 | 0.12 | 1.36 | 0.11 |
| AT5G25880 | N97161   | malate dehydrogenase                                         | 3.28 | 0.54 | 3.35 | 0.49 | 2.34 | 0.55 | 1.22 | 0.28 |
| AT5G26030 | N38420   | ferrochelatase-I                                             | 3.53 | 0.93 | 4.47 | 1.34 | 3.76 | 0.24 | 1.63 | 0.12 |
| AT5G37770 | AA067498 | CALMODULIN-RELATED PROTEIN 2 (TCH2)                          | 1.98 | 0.30 | 3.30 | 0.27 | 3.13 | 1.31 | 1.27 | 0.18 |
| AT5G38410 | N64949   | (RuBisCO small subunit 3b)                                   | 2.33 | 0.61 | 5.56 | 2.69 | 2.99 | 0.24 | 1.26 | 0.42 |
| AT5G42050 | T21358   | unknown protein                                              | 4.87 | 0.37 | 5.12 | 1.12 | 3.00 | 0.74 | 1.34 | 0.13 |
|           | T44501   |                                                              | 3.70 | 0.66 | 4.34 | 1.05 | 2.58 | 0.57 | 1.37 | 0.11 |
| AT5G42380 | R30557   | calmodulin-related protein                                   | 5.29 | 1.33 | 6.35 | 0.89 | 5.17 | 0.81 | 1.17 | 0.17 |
| AT5G42500 | R89967   | similar to disease resistance response protein               | 1.72 | 0.31 | 2.02 | 0.10 | 1.85 | 0.28 | 0.86 | 0.10 |
| AT5G42650 | N65720   | AOS - Allene oxide synthase - JA biosynthesis                | 3.00 | 0.45 | 4.53 | 0.64 | 3.14 | 0.48 | 1.27 | 0.21 |
| AT5G45280 | T41817   | pectinacetyltransferase, putative                            | 2.14 | 0.48 | 2.58 | 0.23 | 1.56 | 0.23 | 1.16 | 0.13 |
| AT5G45350 | AA067411 | unknown protein                                              | 1.36 | 0.20 | 1.93 | 0.23 | 1.86 | 0.18 | 1.15 | 0.11 |
|           | T42791   |                                                              | 1.77 | 0.24 | 2.39 | 0.29 | 2.25 | 0.08 | 1.16 | 0.18 |
| AT5G46500 | T22187   | unknown protein                                              | 1.37 | 0.20 | 1.72 | 0.28 | 1.79 | 0.23 | 1.00 | 0.09 |
| AT5G53350 | T20819   | ATP-dependent Clp protease ATP-binding subunit ClpX1         | 2.89 | 0.86 | 2.88 | 1.00 | 2.08 | 0.15 | 0.96 | 0.23 |
| AT5G56870 | T42972   | glycosyl hydrolase family 35 (beta-galactosidase)            | 3.31 | 0.25 | 4.21 | 0.27 | 2.49 | 0.53 | 1.29 | 0.06 |
| AT5G56980 | T21530   | unknown protein                                              | 2.01 | 0.52 | 3.51 | 0.21 | 2.67 | 0.70 | 0.98 | 0.13 |
| AT5G57220 | T88150   | CYP81F2 cytochrome p450                                      | 5.54 | 1.30 | 7.29 | 1.55 | 3.37 | 1.28 | 1.51 | 0.28 |
| AT5G59550 | R30129   | COP1-interacting protein CIP8                                | 2.92 | 0.52 | 3.32 | 0.79 | 2.50 | 0.55 | 1.43 | 0.18 |
| AT5G62570 | H37503   | calmodulin-binding protein                                   | 1.88 | 0.16 | 2.04 | 0.21 | 1.98 | 0.82 | 1.17 | 0.05 |
| AT5G64310 | T46733   | arabinogalactan-protein (AGP1)                               | 8.03 | 2.45 | 9.05 | 1.90 | 1.82 | 0.43 | 1.31 | 0.16 |
| AT5G65630 | T42826   | unknown protein                                              | 1.50 | 0.48 | 1.67 | 0.21 | 2.10 | 0.19 | 1.05 | 0.12 |
| unknown   | N97187   |                                                              | 1.95 | 0.08 | 2.88 | 1.02 | 2.71 | 0.31 | 1.21 | 0.08 |
| unknown   | N97200   |                                                              | 4.00 | 0.27 | 4.49 | 1.73 | 2.50 | 0.34 | 1.41 | 0.20 |
| unknown   | T45312   |                                                              | 1.88 | 0.52 | 2.82 | 0.13 | 2.00 | 0.33 | 1.15 | 0.13 |
| average   |          |                                                              | 3.02 |      | 3.89 |      | 2.48 |      | 1.25 |      |
