# Supplementary material
Source: PubMed Central journal article supplement (PMC1626612)
Supplement: plntcell_tpc.106.042713_4.pdf [file plntcell_tpc.106.042713_4.pdf]

**Supplementary Table II - W7 induced calcium independent upregulated ESTs**

| Loci      | ESTs   | description                                                                                                         | fold upregulation average TFP/control | standard error TFP/control | fold upregulation average W7/control | standard error W7/control | fold upregulation average W7/W7 - Ca | standard error W7/W7 - Ca | fold upregulation average W7 - Ca/control - Ca | standard error W7 - Ca/control - Ca |
|-----------|--------|---------------------------------------------------------------------------------------------------------------------|---------------------------------------|----------------------------|--------------------------------------|---------------------------|--------------------------------------|---------------------------|------------------------------------------------|-------------------------------------|
| AT1G02880 | T21911 | thiamin pyrophosphokinase, putative                                                                                 | 1.57                                  | 0.04                       | 1.76                                 | 0.05                      | 0.83                                 | 0.09                      | 0.98                                           | 0.05                                |
| AT1G02920 | R90187 | GST                                                                                                                 | 2.46                                  | 0.48                       | 4.18                                 | 1.13                      | 1.13                                 | 0.31                      | 1.09                                           | 0.13                                |
|           | W43242 |                                                                                                                     | 2.07                                  | 0.17                       | 4.54                                 | 1.16                      | 0.94                                 | 0.18                      | 1.00                                           | 0.08                                |
| AT1G03220 | R65072 | extracellular dermal glycoprotein (EDGP)                                                                            | 5.34                                  | 1.04                       | 5.45                                 | 0.95                      | 1.44                                 | 0.24                      | 1.33                                           | 0.19                                |
| AT1G03230 | R84105 | extracellular dermal glycoprotein (EDGP)                                                                            | 4.63                                  | 0.57                       | 4.77                                 | 1.25                      | 1.24                                 | 0.18                      | 1.41                                           | 0.07                                |
| AT1G04140 | N65081 | unknown protein                                                                                                     | 5.09                                  | 1.96                       | 5.32                                 | 0.81                      | 0.91                                 | 0.20                      | 1.17                                           | 0.30                                |
| AT1G05150 | N37173 | putative O-GlcNAc transferase                                                                                       | 1.15                                  | 0.14                       | 1.99                                 | 0.26                      | 1.05                                 | 0.11                      | 1.07                                           | 0.08                                |
| AT1G08940 | T44436 | unknown protein                                                                                                     | 2.44                                  | 0.37                       | 2.19                                 | 0.09                      | 1.07                                 | 0.16                      | 1.13                                           | 0.13                                |
| AT1G10370 | H36275 | GST                                                                                                                 | 2.63                                  | 0.72                       | 2.28                                 | 0.29                      | 0.99                                 | 0.10                      | 0.96                                           | 0.19                                |
| AT1G13210 | T45045 | potential phospholipid-transporting ATPase 11                                                                       | 2.24                                  | 0.85                       | 1.98                                 | 0.19                      | 0.70                                 | 0.04                      | 1.08                                           | 0.11                                |
| AT1G15210 | N97039 | ABC transporter family protein                                                                                      | 1.58                                  | 0.21                       | 1.96                                 | 0.17                      | 1.63                                 | 0.52                      | 1.04                                           | 0.17                                |
| AT1G20500 | H77072 | unknown protein                                                                                                     | 1.88                                  | 0.35                       | 2.43                                 | 0.35                      | 1.69                                 | 0.39                      | 0.85                                           | 0.17                                |
| AT1G21750 | H36733 | putative protein disulfide isomerase precursor                                                                      | 5.64                                  | 2.65                       | 4.04                                 | 0.81                      | 0.73                                 | 0.22                      | 1.12                                           | 0.26                                |
| AT1G25500 | N37553 | unknown protein                                                                                                     | 2.70                                  | 0.84                       | 3.69                                 | 0.16                      | 1.02                                 | 0.08                      | 1.09                                           | 0.24                                |
| AT1G29910 | N64973 | photosystem II type I chlorophyll a/b binding protein, putative                                                     | 4.25                                  | 1.95                       | 4.76                                 | 0.43                      | 0.78                                 | 0.11                      | 1.07                                           | 0.22                                |
| AT1G62300 | T43869 | WRKY family transcription factor                                                                                    | 3.02                                  | 0.85                       | 2.76                                 | 0.62                      | 0.91                                 | 0.14                      | 1.39                                           | 0.10                                |
| AT1G65260 | N37557 | contains similarity to chloroplast membrane-associated protein IM30                                                 | 2.37                                  | 0.70                       | 3.33                                 | 0.07                      | 1.18                                 | 0.02                      | 0.99                                           | 0.19                                |
| AT1G68580 | H77084 | unknown protein                                                                                                     | 1.39                                  | 0.24                       | 1.89                                 | 0.11                      | 1.03                                 | 0.03                      | 0.95                                           | 0.10                                |
| AT1G72770 | T43928 | protein phosphatase 2C (AtP2C-HA)                                                                                   | 1.44                                  | 0.31                       | 2.05                                 | 0.17                      | 1.33                                 | 0.21                      | 0.98                                           | 0.17                                |
| AT1G75680 | W43406 | glycosyl hydrolase family 9 / similar to endo-beta-1,4-glucanase                                                    | 0.96                                  | 0.17                       | 1.77                                 | 0.14                      | 1.21                                 | 0.07                      | 1.07                                           | 0.12                                |
| AT1G75860 | R65061 | unknown protein                                                                                                     | 1.51                                  | 0.35                       | 2.88                                 | 0.53                      | 1.72                                 | 0.58                      | 0.93                                           | 0.09                                |
| AT1G76970 | N97071 | contains similarity to seed protein B32E                                                                            | 2.65                                  | 0.25                       | 2.41                                 | 0.32                      | 1.34                                 | 0.12                      | 0.97                                           | 0.12                                |
| AT1G80110 | N96461 | contains similarity to PP2 lectin polypeptide                                                                       | 2.40                                  | 0.60                       | 1.79                                 | 0.20                      | 1.26                                 | 0.14                      | 0.78                                           | 0.03                                |
| AT2G02960 | T76663 | unknown protein                                                                                                     | 1.87                                  | 0.48                       | 2.20                                 | 0.09                      | 1.24                                 | 0.12                      | 1.05                                           | 0.21                                |
| AT2G05990 | R90100 | enoyl-ACP reductase (enr-A)                                                                                         | 2.24                                  | 0.46                       | 2.17                                 | 0.21                      | 1.43                                 | 0.10                      | 1.06                                           | 0.14                                |
| AT2G07688 | N37414 | unknown protein                                                                                                     | 3.23                                  | 1.22                       | 1.92                                 | 0.25                      | 0.73                                 | 0.26                      | 0.90                                           | 0.12                                |
| AT2G18690 | R65079 | unknown protein                                                                                                     | 3.71                                  | 0.13                       | 5.21                                 | 1.68                      | 1.48                                 | 0.36                      | 1.16                                           | 0.16                                |
| AT2G18970 | N37609 | unknown protein                                                                                                     | 2.36                                  | 0.59                       | 3.11                                 | 0.43                      | 1.04                                 | 0.12                      | 0.94                                           | 0.15                                |
| AT2G22900 | T76358 | unknown protein                                                                                                     | 3.38                                  | 1.73                       | 2.67                                 | 0.14                      | 0.77                                 | 0.13                      | 1.24                                           | 0.26                                |
| AT2G23320 | H36048 | WRKY family transcription factor - WRKY15                                                                           | 3.19                                  | 1.05                       | 3.70                                 | 0.37                      | 1.41                                 | 0.29                      | 1.29                                           | 0.03                                |
| AT2G26560 | T42260 | patatin, putative / similar to patatin-like latex allergen                                                          | 1.71                                  | 0.33                       | 2.40                                 | 0.39                      | 0.90                                 | 0.09                      | 1.10                                           | 0.09                                |
| AT2G26990 | W43761 | COP9 complex subunit CSN2, putative                                                                                 | 3.47                                  | 1.16                       | 3.55                                 | 0.36                      | 1.00                                 | 0.11                      | 1.03                                           | 0.22                                |
| AT2G27310 | T21586 | unknown protein / supported by cDNA: gi_13877666                                                                    | 2.05                                  | 0.12                       | 1.78                                 | 0.04                      | 1.17                                 | 0.13                      | 1.13                                           | 0.36                                |
| AT2G31880 | N65616 | leucine-rich repeat transmembrane protein kinase, putative                                                          | 1.92                                  | 0.55                       | 2.80                                 | 0.29                      | 1.34                                 | 0.39                      | 1.28                                           | 0.24                                |
| AT2G31900 | N37543 | putative unconventional myosin                                                                                      | 1.49                                  | 0.25                       | 1.84                                 | 0.07                      | 0.96                                 | 0.13                      | 1.08                                           | 0.04                                |
| AT2G34660 | N37563 | glutathione S-conjugate ABC transporter (AtMRP2) / almost identical to MgATP-energized glutathione S-conjugate pump | 2.95                                  | 1.49                       | 2.38                                 | 0.34                      | 0.72                                 | 0.12                      | 1.00                                           | 0.05                                |
| AT2G38360 | T88274 | unknown protein                                                                                                     | 2.23                                  | 0.28                       | 2.85                                 | 0.27                      | 1.23                                 | 0.20                      | 1.35                                           | 0.32                                |
| AT2G41410 | H36575 | calmodulin-like protein                                                                                             | 1.71                                  | 0.27                       | 1.95                                 | 0.09                      | 1.29                                 | 0.17                      | 1.22                                           | 0.15                                |

|           |          |                                                                                     |      |      |      |      |      |      |      |      |
|-----------|----------|-------------------------------------------------------------------------------------|------|------|------|------|------|------|------|------|
| AT2G41640 | T44481   | unknown protein                                                                     | 3.29 | 0.39 | 2.54 | 0.33 | 1.41 | 0.12 | 1.54 | 0.39 |
| AT2G47390 | H77233   | unknown protein                                                                     | 3.16 | 1.43 | 2.15 | 0.25 | 0.78 | 0.20 | 1.00 | 0.13 |
| AT2G47730 | N65628   | GST6                                                                                | 6.41 | 3.02 | 3.97 | 0.46 | 0.84 | 0.34 | 1.23 | 0.15 |
| AT3G01290 | R65336   | unknown protein                                                                     | 1.92 | 0.43 | 2.09 | 0.35 | 1.37 | 0.16 | 1.15 | 0.07 |
| AT3G01570 | H76640   | oleosin                                                                             | 3.06 | 0.75 | 2.25 | 0.20 | 1.17 | 0.08 | 1.12 | 0.12 |
| AT3G04240 | N96122   | putative O-linked GlcNAc transferase                                                | 3.02 | 1.28 | 2.15 | 0.28 | 0.69 | 0.10 | 1.09 | 0.14 |
| AT3G07560 | H77117   | unknown protein                                                                     | 1.80 | 0.88 | 2.29 | 0.23 | 1.20 | 0.08 | 1.11 | 0.10 |
| AT3G08760 | R65414   | putative protein kinase                                                             | 2.78 | 0.28 | 1.93 | 0.17 | 0.97 | 0.11 | 1.30 | 0.34 |
| AT3G09260 | N65420   | glycosyl hydrolase family 1 / almost identical to beta-glucosidase                  | 6.91 | 3.76 | 4.58 | 0.39 | 0.71 | 0.10 | 1.08 | 0.27 |
| AT3G09390 | AA042473 | metallothionein-like protein                                                        | 2.43 | 0.80 | 2.48 | 0.35 | 0.91 | 0.12 | 1.04 | 0.13 |
| AT3G16640 | AA042588 | translationally controlled tumor protein-like protein                               | 3.66 | 1.66 | 1.93 | 0.25 | 0.93 | 0.04 | 0.95 | 0.16 |
| AT3G21720 | W43445   | putative isocitrate lyase                                                           | 1.88 | 0.06 | 2.32 | 0.24 | 1.47 | 0.19 | 1.11 | 0.14 |
| AT3G22310 | H76736   | putative RNA helicase                                                               | 4.51 | 2.69 | 3.65 | 0.39 | 0.87 | 0.03 | 1.05 | 0.17 |
| AT3G23170 | N65028   | unknown protein                                                                     | 1.66 | 0.16 | 1.83 | 0.14 | 1.14 | 0.15 | 0.68 | 0.05 |
| AT3G26910 | T76738   | unknown protein                                                                     | 4.06 | 0.60 | 2.60 | 0.41 | 1.24 | 0.06 | 1.24 | 0.25 |
| AT3G46510 | R87023   | arm repeat containing protein homolog                                               | 1.53 | 0.53 | 2.14 | 0.28 | 1.15 | 0.04 | 1.11 | 0.06 |
| AT3G47340 | N37610   | glutamine-dependent asparagine synthetase                                           | 1.81 | 0.43 | 1.97 | 0.29 | 1.07 | 0.12 | 0.96 | 0.04 |
| AT3G53990 | N65857   | similar to ER6 protein - Lycopersicon esculentum                                    | 1.15 | 0.18 | 2.15 | 0.31 | 1.47 | 0.09 | 1.17 | 0.10 |
| AT3G54640 | T21998   | tryptophan synthase alpha chain                                                     | 2.04 | 0.10 | 2.83 | 0.37 | 1.48 | 0.24 | 1.24 | 0.27 |
| AT3G55430 | R90193   | glycosyl hydrolase family 17 (beta-1,3-glucanase)                                   | 2.10 | 0.04 | 2.11 | 0.24 | 1.05 | 0.09 | 1.17 | 0.09 |
| AT4G01870 | N37624   | unknown protein                                                                     | 1.98 | 0.28 | 2.83 | 0.50 | 1.16 | 0.34 | 1.39 | 0.13 |
| AT4G08950 | N95936   | putative phi-1-like phosphate-induced protein                                       | 3.24 | 0.79 | 2.99 | 0.57 | 1.14 | 0.43 | 1.12 | 0.14 |
| AT4G10020 | AA041112 | putative oxidoreductase                                                             | 1.49 | 0.08 | 1.85 | 0.15 | 1.37 | 0.22 | 1.04 | 0.08 |
| AT4G13860 | N37162   | RRM-containing protein                                                              | 1.53 | 0.24 | 1.86 | 0.01 | 1.76 | 0.50 | 0.98 | 0.05 |
| AT4G15450 | T46704   | unknown protein                                                                     | 2.14 | 0.16 | 2.74 | 0.48 | 1.51 | 0.35 | 1.17 | 0.04 |
| AT4G27720 | W43316   | putative protein                                                                    | 1.46 | 0.19 | 1.77 | 0.05 | 1.55 | 0.24 | 0.90 | 0.15 |
| AT4G30470 | N65754   | cinnamoyl-CoA reductase - like protein                                              | 1.76 | 0.19 | 2.16 | 0.30 | 1.24 | 0.18 | 0.91 | 0.09 |
| AT4G32620 | N37931   | unknown protein                                                                     | 1.77 | 0.49 | 1.98 | 0.24 | 1.07 | 0.05 | 0.95 | 0.14 |
| AT4G39330 | T76074   | cinnamyl-alcohol dehydrogenase CAD1                                                 | 1.90 | 0.37 | 1.93 | 0.24 | 1.06 | 0.12 | 1.19 | 0.05 |
| AT5G03180 | H76914   | unknown protein                                                                     | 5.35 | 2.94 | 3.29 | 0.35 | 0.71 | 0.06 | 0.95 | 0.10 |
| AT5G03630 | R90280   | monodehydroascorbate reductase, putative                                            | 1.78 | 0.27 | 2.46 | 0.49 | 1.14 | 0.32 | 1.03 | 0.08 |
| AT5G16010 | T43852   | steroid 5alpha-reductase-like protein                                               | 1.27 | 0.26 | 1.85 | 0.11 | 0.97 | 0.23 | 0.76 | 0.10 |
| AT5G21090 | T21150   | leucine-rich repeat protein                                                         | 1.23 | 0.28 | 2.07 | 0.27 | 1.40 | 0.25 | 1.09 | 0.07 |
| AT5G22000 | N96476   | Expressed protein                                                                   | 2.95 | 0.68 | 2.05 | 0.30 | 0.73 | 0.28 | 1.19 | 0.08 |
| AT5G24800 | H76930   | bZIP protein, G/HBF-1-related / light-induced protein CPRF-2 - Petroselinum crispum | 2.40 | 1.01 | 2.24 | 0.39 | 0.77 | 0.11 | 1.00 | 0.19 |
| AT5G25265 | H76923   | unknown protein                                                                     | 2.26 | 0.84 | 2.30 | 0.35 | 0.76 | 0.08 | 0.98 | 0.09 |
| AT5G25350 | N38266   | leucine-rich repeats containing protein / grr1 - Glycine max                        | 3.59 | 1.29 | 5.30 | 0.60 | 0.99 | 0.19 | 1.01 | 0.24 |
| AT5G26000 | T21685   | glycosyl hydrolase family 1, myrosinase precursor                                   | 3.31 | 1.32 | 2.78 | 0.29 | 0.84 | 0.09 | 1.00 | 0.16 |
| AT5G44440 | T45555   | FAD-linked oxidoreductase family                                                    | 2.74 | 0.94 | 4.89 | 1.21 | 0.94 | 0.27 | 1.11 | 0.06 |
| AT5G52540 | T88428   | unknown protein                                                                     | 1.61 | 0.26 | 2.67 | 0.31 | 1.55 | 0.23 | 0.99 | 0.16 |
| AT5G52920 | N96241   | pyruvate kinase                                                                     | 4.10 | 1.91 | 2.67 | 0.60 | 0.64 | 0.04 | 1.08 | 0.30 |
| AT5G55120 | N38393   | unknown protein                                                                     | 1.92 | 0.59 | 1.98 | 0.04 | 1.49 | 0.23 | 1.03 | 0.21 |
| AT5G60530 | T45284   | late embryonic abundant protein - like                                              | 1.80 | 0.27 | 2.33 | 0.41 | 0.72 | 0.20 | 1.19 | 0.15 |
| AT5G64260 | R89938   | phi-1-like protein                                                                  | 1.57 | 0.22 | 2.05 | 0.25 | 1.09 | 0.16 | 1.09 | 0.10 |
| unknown   | AA042610 |                                                                                     | 3.01 | 1.17 | 2.24 | 0.17 | 0.67 | 0.18 | 1.09 | 0.20 |
| unknown   | AA042713 |                                                                                     | 1.38 | 0.21 | 1.83 | 0.19 | 0.95 | 0.04 | 1.07 | 0.31 |
| unknown   | AA042749 |                                                                                     | 3.75 | 1.14 | 3.69 | 0.64 | 1.33 | 0.40 | 1.18 | 0.20 |

|         |        |  |      |      |      |      |      |      |      |      |
|---------|--------|--|------|------|------|------|------|------|------|------|
| unknown | H76566 |  | 4.34 | 1.81 | 2.93 | 0.24 | 0.60 | 0.15 | 1.12 | 0.22 |
| unknown | H77010 |  | 2.46 | 0.54 | 2.72 | 0.38 | 1.18 | 0.04 | 1.03 | 0.11 |
| unknown | H77014 |  | 5.26 | 3.11 | 3.64 | 0.51 | 0.77 | 0.13 | 1.14 | 0.20 |
| unknown | N37617 |  | 4.44 | 2.14 | 3.37 | 0.60 | 1.01 | 0.03 | 1.02 | 0.20 |
| unknown | N37896 |  | 3.22 | 0.83 | 2.86 | 0.17 | 0.76 | 0.07 | 0.95 | 0.18 |
| unknown | N37911 |  | 4.87 | 2.11 | 4.49 | 0.90 | 0.77 | 0.25 | 1.11 | 0.27 |
| unknown | N38416 |  | 2.34 | 0.63 | 2.57 | 0.22 | 0.77 | 0.11 | 1.10 | 0.20 |
| unknown | N96255 |  | 3.17 | 2.06 | 1.81 | 0.21 | 1.45 | 0.14 | 0.87 | 0.07 |
| unknown | N96775 |  | 3.08 | 0.99 | 2.86 | 0.56 | 0.80 | 0.20 | 1.24 | 0.26 |
| unknown | R90273 |  | 2.96 | 1.13 | 2.14 | 0.16 | 0.81 | 0.19 | 1.04 | 0.16 |
| unknown | T43763 |  | 1.24 | 0.38 | 1.95 | 0.14 | 1.21 | 0.34 | 1.06 | 0.11 |
| unknown | W43205 |  | 3.30 | 0.51 | 3.98 | 0.61 | 0.91 | 0.15 | 1.30 | 0.21 |
| average |        |  | 2.70 |      | 2.73 |      | 1.09 |      | 1.08 |      |
