# Supplementary material
Source: PubMed Central journal article supplement (PMC1626612)
Supplement: plntcell_tpc.106.042713_5.pdf [file plntcell_tpc.106.042713_5.pdf]

**Supplementary Table III - W7 repressed calcium independent down regulated ESTs**

| loci      | EST      | description                                                                                 | Fold downregulation average TFP/control | standard error TFP/control | Fold downregulation average W7/control | standard error W7/control | Fold downregulation average W7/W7 - Ca | standard error W7/W7 - Ca | Fold downregulation average W7 - Ca/control - Ca | standard error W7 - Ca/control - Ca |
|-----------|----------|---------------------------------------------------------------------------------------------|-----------------------------------------|----------------------------|----------------------------------------|---------------------------|----------------------------------------|---------------------------|--------------------------------------------------|-------------------------------------|
| AT1G02205 | N38051   | contains similarity to lipid transfer protein                                               | 1.09                                    | 0.16                       | 1.80                                   | 0.11                      | 1.27                                   | 0.32                      | 0.93                                             | 0.06                                |
| AT1G03090 | H36836   | putative 3-methylcrotonyl-CoA carboxylase                                                   | 1.05                                    | 0.16                       | 1.79                                   | 0.19                      | 1.38                                   | 0.15                      | 1.27                                             | 0.16                                |
| AT1G04410 | N96490   | putative malate dehydrogenase                                                               | 1.41                                    | 0.31                       | 1.76                                   | 0.07                      | 1.08                                   | 0.15                      | 1.03                                             | 0.12                                |
|           | T42329   |                                                                                             | 1.21                                    | 0.13                       | 1.81                                   | 0.19                      | 1.22                                   | 0.10                      | 1.12                                             | 0.13                                |
| AT1G09740 | T43334   | putative ER6 protein                                                                        | 1.34                                    | 0.42                       | 1.83                                   | 0.16                      | 1.90                                   | 0.57                      | 1.75                                             | 0.66                                |
| AT1G56220 | N65433   | unknown protein                                                                             | 1.36                                    | 0.11                       | 2.05                                   | 0.11                      | 1.44                                   | 0.28                      | 1.09                                             | 0.09                                |
| AT1G61740 | H36406   | unknown protein                                                                             | 1.21                                    | 0.20                       | 1.78                                   | 0.11                      | 1.22                                   | 0.13                      | 1.24                                             | 0.11                                |
| AT1G62080 | AA067506 | unknown protein                                                                             | 2.30                                    | 0.78                       | 1.81                                   | 0.22                      | 1.00                                   | 0.06                      | 0.96                                             | 0.07                                |
| AT1G68560 | N37141   | glycosyl hydrolase family 31 (alpha-xylosidase)                                             | 2.08                                    | 0.67                       | 2.18                                   | 0.30                      | 1.23                                   | 0.04                      | 1.22                                             | 0.03                                |
| AT1G80460 | T43219   | similar to GLYCEROL KINASE                                                                  | 1.09                                    | 0.14                       | 1.92                                   | 0.11                      | 1.42                                   | 0.17                      | 1.40                                             | 0.18                                |
| AT2G30620 | T42725   | histone H1                                                                                  | 1.63                                    | 0.11                       | 2.08                                   | 0.25                      | 1.26                                   | 0.09                      | 1.25                                             | 0.10                                |
| AT2G37130 | N96395   | peroxidase, putative (ATP2a)                                                                | 1.76                                    | 0.31                       | 1.84                                   | 0.22                      | 1.24                                   | 0.07                      | 1.13                                             | 0.10                                |
| AT2G43610 | T22039   | glycosyl hydrolase family 19 (chitinase)                                                    | 1.73                                    | 0.17                       | 1.87                                   | 0.14                      | 1.70                                   | 0.53                      | 1.08                                             | 0.16                                |
| AT2G45960 | N65882   | aquaporin (plasma membrane intrinsic protein 1B)                                            | 1.58                                    | 0.35                       | 1.79                                   | 0.12                      | 1.27                                   | 0.06                      | 1.26                                             | 0.07                                |
| AT3G09260 | N96636   | glycosyl hydrolase family 1 / almost identical to beta-glucosidase                          | 1.54                                    | 0.38                       | 2.48                                   | 0.31                      | 1.29                                   | 0.15                      | 1.33                                             | 0.16                                |
|           | W43104   |                                                                                             | 3.19                                    | 1.75                       | 2.23                                   | 0.36                      | 0.91                                   | 0.07                      | 1.16                                             | 0.23                                |
| AT3G13750 | W43678   | glycosyl hydrolase family 35 (beta-galactosidase) / similar to beta-galactosidase precursor | 1.52                                    | 0.32                       | 1.95                                   | 0.10                      | 1.20                                   | 0.13                      | 1.18                                             | 0.14                                |
| AT3G21510 | T46792   | two-component phosphorelay mediator, putative / similar to ATP2                             | 1.24                                    | 0.08                       | 2.02                                   | 0.04                      | 1.27                                   | 0.08                      | 1.11                                             | 0.15                                |
| AT3G26740 | N65532   | light regulated protein, putative                                                           | 2.16                                    | 0.26                       | 2.49                                   | 0.29                      | 1.62                                   | 0.26                      | 1.35                                             | 0.05                                |
| AT3G53430 | T42421   | 60S RIBOSOMAL PROTEIN L12 -like                                                             | 1.29                                    | 0.27                       | 1.86                                   | 0.25                      | 1.33                                   | 0.17                      | 1.27                                             | 0.21                                |
| AT4G12550 | H77253   | putative cell wall-plasma membrane disconnecting CLCT protein (AIR1A)                       | 2.66                                    | 1.11                       | 6.30                                   | 2.12                      | 3.02                                   | 2.08                      | 1.22                                             | 0.36                                |
| AT4G15390 | T21211   | similar to alcohol acyltransferase                                                          | 1.49                                    | 0.16                       | 2.19                                   | 0.31                      | 1.09                                   | 0.30                      | 0.76                                             | 0.07                                |
| AT4G21960 | N65901   | peroxidase, putative                                                                        | 1.42                                    | 0.26                       | 1.99                                   | 0.19                      | 1.43                                   | 0.13                      | 1.18                                             | 0.16                                |
|           | N97208   |                                                                                             | 1.57                                    | 0.15                       | 1.88                                   | 0.07                      | 1.42                                   | 0.25                      | 1.11                                             | 0.14                                |
| AT4G26130 | T20837   | unknown protein                                                                             | 1.10                                    | 0.18                       | 2.00                                   | 0.27                      | 1.15                                   | 0.26                      | 1.09                                             | 0.27                                |

|               |                                      |                                                                                             |                              |                              |                              |                              |                              |                              |                              |                              |
|---------------|--------------------------------------|---------------------------------------------------------------------------------------------|------------------------------|------------------------------|------------------------------|------------------------------|------------------------------|------------------------------|------------------------------|------------------------------|
| AT4G30190     | N65613<br>N65849<br>T22206<br>W43684 | H <sup>+</sup> -transporting ATPase<br>type 2, plasma membrane                              | 1.96<br>1.86<br>1.70<br>1.41 | 0.44<br>0.46<br>0.19<br>0.22 | 2.17<br>2.01<br>2.34<br>1.79 | 0.29<br>0.20<br>0.27<br>0.11 | 0.86<br>0.90<br>1.08<br>1.30 | 0.11<br>0.17<br>0.06<br>0.08 | 0.96<br>1.02<br>1.06<br>1.25 | 0.10<br>0.15<br>0.09<br>0.13 |
| AT4G31910     | R30296                               | anthranilate N-<br>hydroxycinnamoyl/benzoyl<br>transferase                                  | 1.25                         | 0.34                         | 1.90                         | 0.17                         | 1.16                         | 0.10                         | 1.20                         | 0.10                         |
| AT4G32420     | T44369                               | putative protein /<br>CDC28/cdc2-like kinase<br>associating arginine-<br>serine cyclophilin | 1.62                         | 0.19                         | 1.82                         | 0.15                         | 1.25                         | 0.03                         | 1.18                         | 0.05                         |
| AT4G34870     | N37554                               | peptidylprolyl isomerase<br>(cyclophilin)                                                   | 3.14                         | 1.13                         | 2.84                         | 0.50                         | 1.24                         | 0.38                         | 0.98                         | 0.12                         |
| AT4G36850     | H77118                               | putative protein                                                                            | 1.76                         | 0.37                         | 2.48                         | 0.17                         | 1.02                         | 0.21                         | 1.02                         | 0.21                         |
| AT4G37980     | N65902                               | cinnamyl-alcohol<br>dehydrogenase ELI3-1                                                    | 1.81                         | 0.34                         | 1.91                         | 0.26                         | 1.11                         | 0.13                         | 1.08                         | 0.12                         |
| AT5G11420     | N65468                               | unknown protein                                                                             | 0.89                         | 0.22                         | 1.84                         | 0.22                         | 1.12                         | 0.24                         | 1.00                         | 0.13                         |
| AT5G23010     | N65307                               | 2-isopropylmalate<br>synthase-like; homocitrate<br>synthase-like                            | 2.51                         | 1.12                         | 1.95                         | 0.03                         | 1.02                         | 0.05                         | 1.01                         | 0.06                         |
| AT5G26260     | N37424<br>R84203                     | unknown protein                                                                             | 2.53<br>3.07                 | 0.69<br>0.89                 | 3.28<br>3.28                 | 0.61<br>0.77                 | 1.29<br>1.35                 | 0.19<br>0.33                 | 1.14<br>1.31                 | 0.14<br>0.32                 |
| AT5G26280     | N65011                               | unknown protein                                                                             | 2.13                         | 0.67                         | 2.06                         | 0.22                         | 1.10                         | 0.20                         | 1.02                         | 0.18                         |
| AT5G39530     | T44194                               | putative protein                                                                            | 1.86                         | 0.46                         | 2.28                         | 0.30                         | 1.27                         | 0.10                         | 1.12                         | 0.08                         |
| AT5G42180     | T43249                               | peroxidase, putative                                                                        | 1.96                         | 0.38                         | 2.20                         | 0.12                         | 1.50                         | 0.13                         | 1.34                         | 0.25                         |
| AT5G44020     | AA042539                             | vegetative storage protein-<br>like                                                         | 0.96                         | 0.14                         | 1.81                         | 0.11                         | 1.49                         | 0.25                         | 1.17                         | 0.08                         |
| AT5G57660     | N65050                               | CONSTANS-like B-box<br>zinc finger protein-like                                             | 1.63                         | 0.26                         | 1.79                         | 0.16                         | 1.48                         | 0.27                         | 1.44                         | 0.28                         |
| AT5G61590     | N65166                               | Ethylene responsive<br>element binding factor 5                                             | 1.55                         | 0.31                         | 1.86                         | 0.03                         | 1.48                         | 0.30                         | 1.47                         | 0.30                         |
| AT5G64100     | T21726                               | identical to peroxidase<br>ATP3a                                                            | 1.91                         | 0.15                         | 1.96                         | 0.09                         | 1.32                         | 0.10                         | 1.12                         | 0.21                         |
| no hits found | N96675                               |                                                                                             | 1.85                         | 0.67                         | 2.19                         | 0.24                         | 1.44                         | 0.16                         | 1.47                         | 0.14                         |
| average       |                                      |                                                                                             | 1.73                         |                              | 2.16                         |                              | 1.31                         |                              | 1.17                         |                              |
