# Supplementary material
Source: PubMed Central journal article supplement (PMC1626612)
Supplement: plntcell_tpc.106.042713_6.pdf [file plntcell_tpc.106.042713_6.pdf]

Supplementary Table IV - W7 repressed calcium-responsive down regulated ESTs

| loci      | EST                                            | description                                                               | Fold downregulation average TFP/control | standard error TFP/control           | Fold downregulation average W7/control | standard error W7/control            | Fold downregulation average W7/W7 - Ca | standard error W7/W7 - Ca            | Fold downregulation average W7 - Ca/control - Ca | standard error W7 - Ca/control - Ca  |
|-----------|------------------------------------------------|---------------------------------------------------------------------------|-----------------------------------------|--------------------------------------|----------------------------------------|--------------------------------------|----------------------------------------|--------------------------------------|--------------------------------------------------|--------------------------------------|
| AT1G02780 | N65309                                         | 60S ribosomal protein L19                                                 | 1.53                                    | 0.01                                 | 1.74                                   | 0.39                                 | 2.87                                   | 0.37                                 | 0.92                                             | 0.05                                 |
| AT1G11580 | T88066                                         | pectin methylesterase                                                     | 1.46                                    | 0.36                                 | 2.23                                   | 0.26                                 | 1.77                                   | 0.29                                 | 1.01                                             | 0.14                                 |
| AT1G15670 | T21823                                         | unknown protein                                                           | 0.60                                    | 0.11                                 | 2.25                                   | 1.16                                 | 1.79                                   | 0.13                                 | 0.87                                             | 0.05                                 |
| AT1G21310 | T43479                                         | unknown protein                                                           | 1.40                                    | 0.25                                 | 1.83                                   | 0.59                                 | 3.44                                   | 0.31                                 | 1.10                                             | 0.21                                 |
| AT1G24040 | H37589                                         | unknown protein                                                           | 1.73                                    | 0.40                                 | 2.52                                   | 0.57                                 | 2.12                                   | 0.23                                 | 0.97                                             | 0.04                                 |
| AT1G35720 | H36260<br>T76739                               | Ca <sup>2+</sup> -dependent membrane-binding protein annexin              | 2.12<br>1.98                            | 0.38<br>0.25                         | 1.82<br>1.67                           | 0.62<br>0.19                         | 1.97<br>2.31                           | 0.07<br>0.19                         | 1.21<br>1.24                                     | 0.13<br>0.22                         |
| AT1G54000 | T88191                                         | myosinase-associated protein, putative                                    | 2.70                                    | 1.43                                 | 2.60                                   | 0.29                                 | 1.73                                   | 0.57                                 | 1.14                                             | 0.16                                 |
| AT1G55250 | N65499                                         | nuclear zinc finger protein                                               | 1.41                                    | 0.17                                 | 1.58                                   | 0.13                                 | 1.84                                   | 0.20                                 | 1.00                                             | 0.12                                 |
| AT1G56220 | N64983<br>T20760<br>T21186                     | unknown protein                                                           | 1.74<br>1.82<br>1.83                    | 0.31<br>0.21<br>0.25                 | 1.95<br>1.98<br>1.94                   | 0.21<br>0.11<br>0.15                 | 1.51<br>1.60<br>1.44                   | 0.19<br>0.22<br>0.28                 | 0.96<br>0.93<br>0.91                             | 0.05<br>0.04<br>0.07                 |
| AT1G62060 | T75641                                         | unknown protein                                                           | 1.44                                    | 0.11                                 | 2.50                                   | 0.10                                 | 1.76                                   | 0.22                                 | 0.91                                             | 0.04                                 |
| AT1G66200 | N65571                                         | glutamine synthetase                                                      | 1.37                                    | 0.27                                 | 2.72                                   | 0.25                                 | 1.70                                   | 0.17                                 | 1.03                                             | 0.10                                 |
| AT1G66270 | N64947<br>N65342<br>N97158                     | glycosyl hydrolase family 1, beta-glucosidase                             | 7.25<br>5.34<br>5.80                    | 4.43<br>2.82<br>2.99                 | 5.45<br>4.19<br>4.79                   | 1.58<br>0.62<br>0.86                 | 1.81<br>2.52<br>2.45                   | 0.50<br>0.59<br>0.71                 | 1.45<br>1.18<br>1.24                             | 0.39<br>0.02<br>0.06                 |
| AT1G73260 | R30257                                         | putative trypsin inhibitor                                                | 1.99                                    | 1.04                                 | 2.80                                   | 1.18                                 | 6.41                                   | 1.34                                 | 0.93                                             | 0.11                                 |
| AT1G80440 | T41717                                         | unknown protein                                                           | 1.10                                    | 0.37                                 | 1.80                                   | 0.24                                 | 2.18                                   | 0.23                                 | 0.94                                             | 0.12                                 |
| AT2G03890 | T88580                                         | unknown protein                                                           | 1.13                                    | 0.24                                 | 1.87                                   | 0.24                                 | 2.12                                   | 0.49                                 | 1.21                                             | 0.05                                 |
| AT2G24260 | H36262                                         | bHLH transcription factor                                                 | 1.37                                    | 0.20                                 | 1.55                                   | 0.20                                 | 1.86                                   | 0.25                                 | 1.05                                             | 0.08                                 |
| AT2G33790 | H36027                                         | putative proline-rich protein                                             | 1.25                                    | 0.14                                 | 1.79                                   | 0.16                                 | 1.62                                   | 0.27                                 | 0.96                                             | 0.13                                 |
| AT2G33830 | N65046<br>N97310<br>N64968                     | auxin-regulated protein                                                   | 1.71<br>1.40<br>1.35                    | 0.69<br>0.52<br>0.09                 | 1.87<br>2.00<br>1.85                   | 0.21<br>0.24<br>0.17                 | 2.31<br>3.14<br>3.74                   | 0.64<br>1.39<br>0.72                 | 1.04<br>1.01<br>1.27                             | 0.09<br>0.04<br>0.24                 |
| AT2G43150 | T41880                                         | putative extensin /                                                       | 1.23                                    | 0.20                                 | 1.63                                   | 0.31                                 | 2.47                                   | 0.41                                 | 0.97                                             | 0.16                                 |
| AT2G46750 | T76287                                         | FAD-linked oxidoreductase family                                          | 1.49                                    | 0.54                                 | 1.86                                   | 0.55                                 | 2.53                                   | 0.25                                 | 0.71                                             | 0.10                                 |
| AT3G03470 | T45663                                         | cyp89a9 - cytochrome p450                                                 | 1.49                                    | 0.40                                 | 1.67                                   | 0.09                                 | 1.85                                   | 0.25                                 | 0.91                                             | 0.14                                 |
| AT3G04445 | T46435                                         | putative polyribonucleotide phosphorylase                                 | 1.96                                    | 0.52                                 | 2.26                                   | 0.42                                 | 2.05                                   | 0.17                                 | 1.14                                             | 0.14                                 |
| AT3G15950 | N65234                                         | unknown protein                                                           | 1.68                                    | 0.53                                 | 2.50                                   | 0.02                                 | 1.87                                   | 0.61                                 | 1.17                                             | 0.08                                 |
| AT3G16420 | N65032<br>N65228<br>N65775<br>R65544<br>W43058 | jacalin-like lectin - similar to myosinase binding protein - JA inducible | 2.37<br>2.57<br>1.40<br>2.14<br>2.30    | 0.83<br>1.06<br>0.26<br>0.49<br>0.96 | 2.74<br>2.67<br>2.40<br>2.14<br>2.11   | 0.37<br>0.33<br>0.30<br>0.15<br>0.43 | 1.74<br>1.75<br>1.74<br>2.03<br>2.14   | 0.24<br>0.30<br>0.21<br>0.39<br>0.32 | 1.27<br>1.24<br>1.16<br>1.15<br>1.12             | 0.11<br>0.13<br>0.03<br>0.15<br>0.10 |

|           |                                                                      |                                                                            |                                                      |                                                      |                                                      |                                                      |                                                      |                                                      |                                                      |                                                      |
|-----------|----------------------------------------------------------------------|----------------------------------------------------------------------------|------------------------------------------------------|------------------------------------------------------|------------------------------------------------------|------------------------------------------------------|------------------------------------------------------|------------------------------------------------------|------------------------------------------------------|------------------------------------------------------|
| AT3G16460 | T46036<br>W43253                                                     | jacalin-like lectin - similar to myrosinase binding protein - JA inducible | 1.35<br>1.97                                         | 0.20<br>0.48                                         | 1.99<br>2.16                                         | 0.25<br>0.11                                         | 2.60<br>2.38                                         | 0.37<br>0.22                                         | 1.06<br>1.09                                         | 0.07<br>0.11                                         |
| AT3G22280 | W43476                                                               | unknown protein                                                            | 1.62                                                 | 0.17                                                 | 1.69                                                 | 0.28                                                 | 1.80                                                 | 0.12                                                 | 0.87                                                 | 0.10                                                 |
| AT3G23190 | T20932                                                               | unknown protein                                                            | 2.67                                                 | 0.31                                                 | 3.84                                                 | 0.59                                                 | 2.69                                                 | 1.00                                                 | 1.33                                                 | 0.18                                                 |
| AT3G26510 | N65790<br>T22188                                                     | octicosapeptide/Phox/Bem1p (PB1) domain-containing protein                 | 1.55<br>1.64                                         | 0.51<br>0.49                                         | 2.13<br>2.16                                         | 0.39<br>0.57                                         | 4.08<br>3.41                                         | 0.49<br>0.33                                         | 1.11<br>1.06                                         | 0.08<br>0.07                                         |
| AT3G26520 | AA042125<br>AA067532<br>N37491<br>N65442<br>T46091<br>T88331         | GAMMA-TIP2 aquaporin                                                       | 1.47<br>1.33<br>1.46<br>1.33<br>1.36<br>1.47         | 0.01<br>0.09<br>0.28<br>0.20<br>0.20<br>0.12         | 1.97<br>2.60<br>1.59<br>2.09<br>1.87<br>2.23         | 0.12<br>0.77<br>0.33<br>0.22<br>0.26<br>0.33         | 1.68<br>2.31<br>1.80<br>2.10<br>1.43<br>1.88         | 0.08<br>0.43<br>0.12<br>0.46<br>0.18<br>0.29         | 1.10<br>0.97<br>1.17<br>0.96<br>1.05<br>1.06         | 0.03<br>0.02<br>0.03<br>0.05<br>0.12<br>0.11         |
| AT3G26740 | N37331<br>N65056<br>N65497<br>N65560<br>N96961<br>N97032<br>T44738   | light regulated protein                                                    | 1.36<br>1.89<br>2.17<br>2.03<br>1.58<br>2.35<br>1.91 | 0.13<br>0.05<br>0.09<br>0.34<br>0.22<br>0.31<br>0.17 | 1.86<br>3.08<br>3.41<br>3.02<br>2.77<br>2.43<br>2.73 | 0.27<br>1.22<br>0.97<br>0.58<br>0.48<br>0.26<br>0.63 | 2.26<br>1.86<br>2.09<br>1.75<br>2.24<br>1.50<br>1.97 | 0.31<br>0.22<br>0.29<br>0.15<br>0.37<br>0.13<br>0.26 | 0.96<br>0.94<br>0.93<br>1.02<br>1.03<br>1.21<br>0.90 | 0.15<br>0.12<br>0.12<br>0.12<br>0.05<br>0.19<br>0.14 |
| AT3G27260 | N96279                                                               | unknown protein                                                            | 1.36                                                 | 0.10                                                 | 2.04                                                 | 0.34                                                 | 1.82                                                 | 0.18                                                 | 1.08                                                 | 0.09                                                 |
| AT3G28550 | N38107                                                               | unknown protein                                                            | 2.24                                                 | 0.38                                                 | 4.85                                                 | 1.64                                                 | 10.27                                                | 6.77                                                 | 1.44                                                 | 0.26                                                 |
| AT3G49070 | N65390                                                               | unknown protein                                                            | 2.06                                                 | 0.65                                                 | 2.60                                                 | 1.03                                                 | 2.73                                                 | 0.43                                                 | 1.08                                                 | 0.18                                                 |
| AT3G49100 | T45597                                                               | signal recognition particle subunit 9 - like                               | 1.81                                                 | 0.42                                                 | 2.31                                                 | 0.21                                                 | 1.51                                                 | 0.08                                                 | 1.07                                                 | 0.31                                                 |
| AT3G51370 | T46496                                                               | protein phosphatase 2C - related protein                                   | 1.48                                                 | 0.27                                                 | 2.27                                                 | 0.12                                                 | 2.26                                                 | 0.37                                                 | 1.15                                                 | 0.12                                                 |
| AT3G51730 | T43972                                                               | unknown protein                                                            | 1.57                                                 | 0.52                                                 | 1.96                                                 | 0.22                                                 | 2.45                                                 | 0.43                                                 | 0.85                                                 | 0.08                                                 |
| AT3G52060 | R90105<br>T44083                                                     | unknown protein                                                            | 1.24<br>1.06                                         | 0.29<br>0.28                                         | 2.63<br>1.60                                         | 0.27<br>0.32                                         | 1.88<br>2.12                                         | 0.31<br>0.14                                         | 1.13<br>1.11                                         | 0.09<br>0.07                                         |
| AT3G53420 | AA067484<br>N65114<br>N96511<br>N97303<br>T42727<br>T44097<br>W43194 | PIP2A - aquaporin                                                          | 1.63<br>1.21<br>1.33<br>1.45<br>1.61<br>1.39<br>1.52 | 0.16<br>0.08<br>0.11<br>0.19<br>0.05<br>0.17<br>0.08 | 1.71<br>2.19<br>1.63<br>1.81<br>2.27<br>2.67<br>1.68 | 0.31<br>0.29<br>0.21<br>0.54<br>0.34<br>0.45<br>0.18 | 2.11<br>1.78<br>1.91<br>1.89<br>2.17<br>2.16<br>2.02 | 0.16<br>0.35<br>0.27<br>0.18<br>0.22<br>0.43<br>0.31 | 1.21<br>1.07<br>1.05<br>1.12<br>1.09<br>1.02<br>0.95 | 0.14<br>0.09<br>0.04<br>0.07<br>0.06<br>0.03<br>0.23 |
| AT3G61430 | N95974                                                               | PIP1A - Aquaporin                                                          | 1.50                                                 | 0.22                                                 | 1.87                                                 | 0.03                                                 | 1.77                                                 | 0.03                                                 | 1.12                                                 | 0.05                                                 |
| AT4G11650 | H76850<br>N97229                                                     | osmotin precursor                                                          | 1.77<br>1.70                                         | 0.85<br>0.89                                         | 3.14<br>3.54                                         | 1.27<br>1.51                                         | 5.06<br>5.64                                         | 1.58<br>1.98                                         | 0.82<br>0.81                                         | 0.04<br>0.07                                         |
| AT4G14060 | T43693                                                               | major latex protein (MLP)-related                                          | 1.59                                                 | 0.26                                                 | 1.83                                                 | 0.21                                                 | 1.63                                                 | 0.09                                                 | 1.27                                                 | 0.07                                                 |
| AT4G16260 | N65329                                                               | glycosyl hydrolase family 17 - glucan endo-1,3-beta-glucosidase            | 2.19                                                 | 0.81                                                 | 1.99                                                 | 0.86                                                 | 3.86                                                 | 0.37                                                 | 0.99                                                 | 0.12                                                 |
| AT4G16360 | N96609                                                               | kinase like protein                                                        | 1.53                                                 | 0.17                                                 | 1.82                                                 | 0.09                                                 | 1.58                                                 | 0.11                                                 | 1.08                                                 | 0.03                                                 |
| AT4G26090 | T88149                                                               | disease resistance protein RPS2 (CC-NBS-LRR class), putative               | 1.71                                                 | 0.75                                                 | 2.78                                                 | 1.12                                                 | 5.69                                                 | 0.57                                                 | 0.98                                                 | 0.08                                                 |
| AT4G30170 | T21036                                                               | peroxidase ATP8a                                                           | 3.64                                                 | 1.23                                                 | 4.22                                                 | 0.82                                                 | 2.30                                                 | 0.57                                                 | 1.42                                                 | 0.14                                                 |

|           |                                                          |                                                                                  |                                              |                                              |                                              |                                              |                                              |                                              |                                              |                                              |
|-----------|----------------------------------------------------------|----------------------------------------------------------------------------------|----------------------------------------------|----------------------------------------------|----------------------------------------------|----------------------------------------------|----------------------------------------------|----------------------------------------------|----------------------------------------------|----------------------------------------------|
| AT4G34030 | T75761                                                   | 3-METHYLCROTONYL-COA CARBOXYLASE, MCCB                                           | 1.42                                         | 0.54                                         | 1.59                                         | 0.19                                         | 1.83                                         | 0.20                                         | 1.03                                         | 0.03                                         |
| AT4G35750 | T42554                                                   | putative protein similar to E1B 19K Bcl-2-interacting protein Nip2, Homo sapiens | 1.18                                         | 0.36                                         | 1.70                                         | 0.15                                         | 1.87                                         | 0.20                                         | 1.00                                         | 0.08                                         |
| AT4G37070 | T41937                                                   | similar to patatin-like latex allergen                                           | 1.25                                         | 0.26                                         | 1.72                                         | 0.44                                         | 2.66                                         | 0.51                                         | 1.10                                         | 0.17                                         |
| AT4G37900 | N97112                                                   | unknown protein                                                                  | 2.08                                         | 0.22                                         | 1.91                                         | 0.26                                         | 1.79                                         | 0.20                                         | 1.13                                         | 0.10                                         |
| AT4G39090 | AA042446<br>N65662<br>N65892<br>N96916<br>T41787         | cysteine proteinase RD19A,                                                       | 1.39<br>1.77<br>1.69<br>1.99<br>1.35         | 0.33<br>0.54<br>0.49<br>0.68<br>0.37         | 1.69<br>1.89<br>2.08<br>1.85<br>2.42         | 0.45<br>0.67<br>0.36<br>0.64<br>0.77         | 2.42<br>2.29<br>3.07<br>3.90<br>4.31         | 0.27<br>0.10<br>0.31<br>0.66<br>0.91         | 1.03<br>1.16<br>1.10<br>1.11<br>0.99         | 0.06<br>0.16<br>0.09<br>0.11<br>0.03         |
| AT5G10300 | R84081                                                   | alpha-hydroxynitrile lyase HNL4                                                  | 1.47                                         | 0.20                                         | 2.70                                         | 0.28                                         | 1.88                                         | 0.31                                         | 0.94                                         | 0.08                                         |
| AT5G13180 | R30592                                                   | hypothetical protein SENU5 - senescence up-regulated                             | 1.25                                         | 0.35                                         | 1.54                                         | 0.11                                         | 3.36                                         | 0.82                                         | 1.16                                         | 0.02                                         |
| AT5G17820 | T45353                                                   | peroxidase ATP13a                                                                | 2.05                                         | 0.57                                         | 2.88                                         | 0.31                                         | 2.14                                         | 0.37                                         | 1.26                                         | 0.26                                         |
| AT5G23660 | T21006                                                   | nodulin MtN3 family protein                                                      | 1.54                                         | 0.19                                         | 2.23                                         | 0.18                                         | 1.97                                         | 0.34                                         | 1.06                                         | 0.14                                         |
| AT5G26260 | H35993<br>N37539                                         | unknown protein                                                                  | 3.54<br>2.59                                 | 1.58<br>0.65                                 | 3.23<br>2.92                                 | 0.42<br>0.26                                 | 1.44<br>1.72                                 | 0.27<br>0.32                                 | 1.42<br>1.19                                 | 0.21<br>0.18                                 |
| AT5G43060 | N65542                                                   | cysteine proteinase RD21A                                                        | 1.79                                         | 0.07                                         | 2.04                                         | 0.14                                         | 1.85                                         | 0.19                                         | 1.04                                         | 0.18                                         |
| AT5G43370 | T46507                                                   | inorganic phosphate transporter (PHT2)                                           | 2.07                                         | 0.67                                         | 2.82                                         | 0.54                                         | 1.93                                         | 0.32                                         | 1.01                                         | 0.05                                         |
| AT5G43450 | H37619                                                   | l-aminocyclopropane-1-carboxylate oxidase                                        | 1.53                                         | 0.34                                         | 1.83                                         | 0.12                                         | 1.43                                         | 0.29                                         | 0.90                                         | 0.14                                         |
| AT5G44020 | N65745<br>N96976<br>T21723                               | vegetative storage protein-related                                               | 1.15<br>1.56<br>1.39                         | 0.25<br>0.21<br>0.10                         | 2.13<br>2.58<br>1.94                         | 0.20<br>0.44<br>0.14                         | 1.74<br>1.84<br>1.75                         | 0.32<br>0.08<br>0.13                         | 1.20<br>1.26<br>1.17                         | 0.09<br>0.01<br>0.02                         |
| AT5G44610 | T21724<br>T22213                                         | unknown protein                                                                  | 1.97<br>1.67                                 | 0.52<br>0.39                                 | 2.74<br>2.42                                 | 0.84<br>0.73                                 | 4.18<br>4.12                                 | 0.34<br>0.84                                 | 1.23<br>0.94                                 | 0.03<br>0.11                                 |
| AT5G47560 | T42907                                                   | sodium-dicarbonic-acid-transporter                                               | 2.08                                         | 0.06                                         | 2.79                                         | 0.14                                         | 1.76                                         | 0.35                                         | 0.96                                         | 0.05                                         |
| AT5G49360 | H37097<br>N65441<br>N96119<br>T42707<br>T75638<br>W43153 | glycosyl hydrolase family 3                                                      | 1.78<br>1.67<br>1.70<br>1.46<br>1.60<br>1.94 | 0.41<br>0.31<br>0.46<br>0.26<br>0.43<br>0.31 | 2.63<br>3.22<br>2.55<br>2.43<br>2.75<br>3.05 | 0.94<br>0.31<br>0.53<br>0.45<br>0.21<br>0.02 | 2.12<br>2.50<br>1.77<br>1.58<br>1.79<br>2.10 | 0.29<br>0.71<br>0.17<br>0.29<br>0.34<br>0.52 | 0.97<br>0.89<br>1.05<br>0.99<br>1.01<br>0.95 | 0.08<br>0.11<br>0.09<br>0.09<br>0.11<br>0.08 |
| AT5G50900 | W43466                                                   | unknown protein                                                                  | 1.77                                         | 0.10                                         | 2.13                                         | 0.23                                         | 1.82                                         | 0.33                                         | 0.95                                         | 0.19                                         |
| AT5G59090 | W43482                                                   | subtilisin-like serine protease                                                  | 1.92                                         | 0.18                                         | 2.16                                         | 0.21                                         | 1.92                                         | 0.35                                         | 0.93                                         | 0.13                                         |
| AT5G59780 | T42666                                                   | putative transcription factor (MYB59)                                            | 1.46                                         | 0.07                                         | 1.79                                         | 0.05                                         | 1.56                                         | 0.07                                         | 1.10                                         | 0.09                                         |
| AT5G59870 | H76422                                                   | histone H2A, putative                                                            | 1.26                                         | 0.33                                         | 1.65                                         | 0.22                                         | 1.92                                         | 0.20                                         | 0.97                                         | 0.02                                         |
| AT5G64100 | N65288<br>T44766                                         | peroxidase ATP3a                                                                 | 1.90<br>2.13                                 | 0.52<br>0.61                                 | 3.67<br>5.50                                 | 0.80<br>1.91                                 | 2.50<br>2.83                                 | 0.63<br>0.64                                 | 0.88<br>0.77                                 | 0.18<br>0.10                                 |

|                     |        |                            |             |      |             |      |             |      |             |      |
|---------------------|--------|----------------------------|-------------|------|-------------|------|-------------|------|-------------|------|
| AT5G65210           | R90199 | bZIP transcription factor, | 1.81        | 0.40 | 2.36        | 0.18 | 2.12        | 0.16 | 1.23        | 0.15 |
|                     | T22979 | TGA1                       | 1.12        | 0.04 | 2.15        | 0.31 | 1.48        | 0.19 | 1.01        | 0.14 |
| <b>average(all)</b> |        |                            | <b>1.81</b> |      | <b>2.38</b> |      | <b>2.36</b> |      | <b>1.06</b> |      |
