# Supplementary material
Source: PubMed Central journal article supplement (PMC1626612)
Supplement: plntcell_tpc.106.042713_7.pdf [file plntcell_tpc.106.042713_7.pdf]

**Supplementary Table V - Classification of calcium-responsive upregulated genes**

| <b>Locus</b>                                              | <b>Description</b>                                       | <b>ABRE motif found within promoters - numbers indicate distance in nucleotide upstream of ATG</b> | <b>ABRE-CE motif found within promoters - numbers indicate distance in nucleotides upstream of ATG</b> |
|-----------------------------------------------------------|----------------------------------------------------------|----------------------------------------------------------------------------------------------------|--------------------------------------------------------------------------------------------------------|
| <i>Transcription factors and DNA/RNA related proteins</i> |                                                          |                                                                                                    |                                                                                                        |
| AT4G17500                                                 | AtERF-1 - ethylene responsive element binding factor 1   | 530                                                                                                |                                                                                                        |
| AT3G15210                                                 | AtERF4 - ethylene responsive element binding factor 4    | 234                                                                                                |                                                                                                        |
| AT1G42990                                                 | bZIP family transcription factor                         | 317, 158                                                                                           | 174                                                                                                    |
| AT1G27730                                                 | ZAT10 - salt induced zinc finger protein                 |                                                                                                    |                                                                                                        |
| AT1G08930                                                 | ERD6 - zinc finger protein ATZF1                         |                                                                                                    |                                                                                                        |
| AT2G28840                                                 | putative RING zinc finger ankyrin protein                |                                                                                                    |                                                                                                        |
| AT2G40140                                                 | CCCH-type zinc finger protein containinig ankyrin-repeat |                                                                                                    |                                                                                                        |
| AT3G55980                                                 | PEI1- CCCH zinc finger transcription factor              |                                                                                                    |                                                                                                        |
| AT4G17490                                                 | AtERF6 - ethylene-responsive element binding factor 6    |                                                                                                    | 186                                                                                                    |
| AT1G18570                                                 | myb51 - R2R3 myb like transcription factor               |                                                                                                    |                                                                                                        |
| AT2G30470                                                 | transcriptional factor B3 family                         |                                                                                                    |                                                                                                        |
| AT3G16720                                                 | ATL2 - RING zinc finger protein                          |                                                                                                    |                                                                                                        |
| AT3G60220                                                 | ATL4 - RING-H2 zinc finger protein                       | 114                                                                                                |                                                                                                        |
| AT4G35480                                                 | RING-H2 finger protein RHA3b                             |                                                                                                    |                                                                                                        |
| AT3G52800                                                 | zinc finger - like protein                               |                                                                                                    |                                                                                                        |
| AT3G58510                                                 | DEAD BOX PROTEIN 3 (RNA HELICASE-LIKE PROTEIN)           |                                                                                                    |                                                                                                        |
| AT1G66260                                                 | export factor RNA binding protein, putative              |                                                                                                    | 710                                                                                                    |
| AT3G54770                                                 | contains RNA recognition motif                           |                                                                                                    |                                                                                                        |
| AT2G45820                                                 | remorin - a non-specific DNA binding protein             | 240                                                                                                | 140, 742, 771                                                                                          |
| <i>Signaling related proteins</i>                         |                                                          |                                                                                                    |                                                                                                        |
| <i>calmodulin related</i>                                 |                                                          |                                                                                                    |                                                                                                        |
| AT2G41110                                                 | ATCAL4                                                   |                                                                                                    | 229                                                                                                    |
| AT2G41100                                                 | ATCAL5 - TCH3 -CaM related protein                       | 136                                                                                                |                                                                                                        |
| AT5G37770                                                 | CALMODULIN-RELATED PROTEIN 2 (TCH2)                      |                                                                                                    | 124, 143                                                                                               |
| AT5G42380                                                 | calmodulin-related protein                               | 398                                                                                                |                                                                                                        |
| AT3G56800                                                 | calmodulin like                                          |                                                                                                    | 335                                                                                                    |
| <i>Kinases</i>                                            |                                                          |                                                                                                    |                                                                                                        |
| AT3G45640                                                 | mitogen-activated protein kinase 3                       |                                                                                                    |                                                                                                        |
| AT3G59350                                                 | protein kinase - Pto kinase interactor 1                 |                                                                                                    | 933                                                                                                    |
| AT2G01450                                                 | ATMPK17 - mitogen-activated protein kinase               |                                                                                                    |                                                                                                        |
| AT1G03740                                                 | cdc2-like protein kinase                                 |                                                                                                    |                                                                                                        |
| AT3G02880                                                 | leucine-rich repeat transmembrane protein kinase         |                                                                                                    |                                                                                                        |
| AT1G51805                                                 | Similar to light repressible LRR-receptor protein kinase |                                                                                                    |                                                                                                        |
| AT3G51550                                                 | receptor-protein kinase                                  |                                                                                                    | 382, 625                                                                                               |
| AT2G30740                                                 | serine/threonine protein kinase                          |                                                                                                    |                                                                                                        |
| AT2G05940                                                 | putative protein kinase                                  |                                                                                                    |                                                                                                        |
| AT3G57530                                                 | calcium dependent protein kinase - CDPK                  |                                                                                                    | 164                                                                                                    |
| <i>others</i>                                             |                                                          |                                                                                                    |                                                                                                        |
| AT1G09070                                                 | Similar to Glycine SRC2                                  |                                                                                                    | 900                                                                                                    |
| AT5G15970                                                 | cold-regulated protein COR6.6 (KIN2)                     | 128, 146, 219, 440                                                                                 |                                                                                                        |
| AT1G20440                                                 | COR47 - ERD10                                            |                                                                                                    | 168                                                                                                    |
| AT2G41430                                                 | ERD15                                                    | 602                                                                                                | 611                                                                                                    |
| AT1G55450                                                 | similar to embryo-abundant protein                       |                                                                                                    |                                                                                                        |
| AT1G35140                                                 | phi1 - phophate induced protein                          |                                                                                                    | 206                                                                                                    |
| AT2G17840                                                 | putative senescence-associated protein 12                |                                                                                                    | 174                                                                                                    |

|                                               |                                                                     |                 |                           |
|-----------------------------------------------|---------------------------------------------------------------------|-----------------|---------------------------|
| <b>AT1G76180</b>                              | <b>dehydrin, putative -ERD14</b>                                    | <b>275, 845</b> |                           |
| AT1G47380                                     | protein phosphatase 2C (PPTC)                                       | 919             | 720                       |
| AT1G23490                                     | RAB-GTPase - putative ADP-ribosylation factor                       |                 |                           |
| AT5G03530                                     | RAB GTPase                                                          |                 |                           |
| AT5G62570                                     | calmodulin-binding protein                                          |                 |                           |
| AT3G23030                                     | auxin-inducible gene (IAA2)                                         |                 |                           |
| AT5G14930                                     | leaf senescence-associated gene SAG101                              |                 |                           |
| AT2G01270                                     | thioredoxin                                                         |                 |                           |
| AT1G11530                                     | thioredoxin h                                                       |                 |                           |
| <hr/>                                         |                                                                     |                 |                           |
| <b><i>Transporters</i></b>                    |                                                                     |                 |                           |
| AT1G59870                                     | ABC transporter family protein                                      | 495             | 359, 375                  |
| AT1G59820                                     | similar to Potential phospholipid-transporting ATPase               |                 | 338, 374, 392, 406        |
| <hr/>                                         |                                                                     |                 |                           |
| <b><i>Photosynthesis</i></b>                  |                                                                     |                 |                           |
| AT1G55670                                     | putative photosystem I subunit V precursor                          | 493             |                           |
| AT5G38410                                     | RuBisCO small subunit 3b                                            | 218             |                           |
| <hr/>                                         |                                                                     |                 |                           |
| <b><i>Cytoskeleton and cell structure</i></b> |                                                                     |                 |                           |
| <b>AT2G32240</b>                              | <b>myosin heavy chain -related</b>                                  |                 | <b>147</b>                |
| AT1G21730                                     | kinesin-related protein                                             |                 |                           |
| <hr/>                                         |                                                                     |                 |                           |
| <b><i>Defense and PCD related genes</i></b>   |                                                                     |                 |                           |
| <b>AT2G40000</b>                              | <b>nematode-resistance protein -related</b>                         |                 | <b>195</b>                |
| <b>AT5G06320</b>                              | <b>NDR1/HIN1-like protein 3 (NHL3)</b>                              |                 |                           |
| AT5G42500                                     | similar to disease resistance response protein                      |                 |                           |
| AT1G33600                                     | LRR protein family                                                  |                 |                           |
| AT1G72910                                     | disease resistance protein (TIR-NBS class), putative                |                 |                           |
| AT1G72930                                     | TIR - TOLL/INTERLEUKIN-1 RECEPTOR-LIKE                              |                 |                           |
| <hr/>                                         |                                                                     |                 |                           |
| <b><i>Proteases</i></b>                       |                                                                     |                 |                           |
| <b>AT4G02380</b>                              | <b>ERD1 - SAG21 -clp protease</b>                                   |                 |                           |
| AT5G53350                                     | ATP-dependent Clp protease ATP-binding subunit ClpX1                |                 |                           |
| AT5G59550                                     | COP1-interacting protein CIP8                                       | 107, 171, 251   |                           |
| <hr/>                                         |                                                                     |                 |                           |
| <b><i>Cellular metabolism and others</i></b>  |                                                                     |                 |                           |
| <b>AT5G42650</b>                              | <b>AOS - Allene oxide synthase - JA biosynthesis</b>                | <b>243</b>      |                           |
| <b>AT1G65310</b>                              | <b>xyloglucan endotransglycosylase TCH4-like</b>                    |                 |                           |
| <b>AT1G62660</b>                              | <b>glycosyl hydrolase family 32, identical to beta-fructosidase</b> |                 |                           |
| <b>AT3G55430</b>                              | <b>glycosyl hydrolase family 17 -beta 1,3 glucanase</b>             | <b>764</b>      |                           |
| <b>AT5G64310</b>                              | <b>AGP1 - arabinogalactan-protein</b>                               |                 | <b>252, 328, 347, 443</b> |
| <b>AT1G03220</b>                              | <b>extracellular dermal glycoprotein (EDGP)</b>                     |                 |                           |
| <b>AT1G78850</b>                              | <b>curculin-like (mannose-binding) lectin family</b>                |                 |                           |
| <b>AT2G22500</b>                              | <b>mitochondrial carrier protein family</b>                         |                 | <b>341</b>                |
| <b>AT4G24570</b>                              | <b>mitochondrial carrier protein family</b>                         |                 | <b>228</b>                |
| <b>AT2G30870</b>                              | <b>GST - ERD13</b>                                                  |                 |                           |
| <b>AT1G27130</b>                              | <b>GST12</b>                                                        |                 |                           |
| AT1G76680                                     | 12-oxophytodienoate reductase (OPR1)                                | 893             |                           |
| AT5G56870                                     | glycosyl hydrolase family 35 (beta-galactosidase)                   |                 |                           |
| AT1G70090                                     | glycosyltransferase family 8                                        | 546             | 15, 201, 219, 935         |
| AT1G22360                                     | UDP-glucose glucosyltransferase                                     |                 |                           |
| AT3G29360                                     | UDP-glucose dehydrogenase -related                                  |                 | 654                       |
| AT2G39770                                     | GDP-mannose pyrophosphorylase                                       |                 |                           |
| AT5G45280                                     | pectinacetyltransferase, putative                                   |                 |                           |
| AT5G24300                                     | strach synthase                                                     | 525             |                           |
| AT5G11740                                     | AGP15 - ARABINOGALACTAN PROTEIN                                     |                 | 360, 410                  |

|           |                                                               |          |               |
|-----------|---------------------------------------------------------------|----------|---------------|
| AT2G46330 | AGP16 - arabinogalactan-protein (AGP16)                       |          |               |
| AT5G13420 | transaldolase - like protein                                  |          |               |
| AT1G55810 | uracil phosphoribosyltransferase                              |          |               |
| AT4G39940 | adenosine-5-phosphosulfate-kinase                             |          |               |
| AT1G73540 | Similar to diphosphoinositol polyphosphate phosphohydrolase   | 641      | 176, 504, 549 |
| AT1G74100 | putative flavonol sulfotransferase                            | 457      |               |
| AT2G45300 | 5-enolpyruvylshikimate-3-phosphate (EPSP) synthase            | 263      | 950           |
| AT4G33070 | pyruvate decarboxylase-1 (Pdc1)                               |          |               |
| AT5G11670 | NADP dependent malic enzyme - like protein                    | 221      |               |
| AT5G25880 | malate dehydrogenase                                          |          |               |
| AT3G17390 | MTO3 - s-adenosylmethionine synthetase - Met biosynthesis     |          | 498           |
| AT5G05730 | ASA1 - anthralinate synthase alpha subunit - Trp biosynthesis |          |               |
| AT3G44720 | prephenate dehydratase family, similar to bacterial PheA      |          |               |
| AT4G30530 | component of aniline dioxygenase                              | 155      |               |
| AT4G38550 | Phospholipase like protein-pEARLI 4                           |          | 200           |
| AT5G24140 | squalene monooxygenase 2                                      | 278      |               |
| AT1G21110 | O-methyltransferase 1, putative                               |          |               |
| AT2G05710 | cytoplasmic aconitate hydratase                               | 647, 932 |               |
| AT5G26030 | ferrochelatase-I                                              |          |               |
| AT4G22710 | CYP706A2 - cytochrome p450                                    |          | 295           |
| AT5G57220 | CYP81F2 cytochrome p450                                       |          |               |
| AT4G31500 | CYP83B1, CYTOCHROME P450 MONOOXYGENASE                        |          |               |
| AT4G39950 | cytochrome P450                                               |          |               |
| AT3G15356 | similar to putative lectin                                    |          |               |
| AT3G16530 | putative lectin                                               |          |               |
| AT1G79900 | mitochondrial carrier protein family                          |          |               |
| AT3G11820 | SYPI21 - syntaxin-related protein                             |          |               |
| AT5G13650 | GTP-binding protein typA (tyrosine phosphorylated protein A)  |          |               |
| AT2G29960 | cyclophilin                                                   |          |               |
| AT3G19260 | LAG1 HOMOLOG 2, LONGEVITY ASSURANCE GENE1                     |          |               |
| AT3G26980 | similar to geranylgeranylated proteins ATGP4                  |          | 554           |
| AT5G03380 | similar to farnesylated protein ATPF2                         | 784      |               |

---

*unknown genes*

---

|                  |                        |                 |                 |
|------------------|------------------------|-----------------|-----------------|
| <b>AT2G23120</b> | <b>unknown protein</b> |                 |                 |
| <b>AT1G19180</b> | <b>unknown protein</b> | <b>284, 342</b> | <b>666, 816</b> |
| <b>AT1G30360</b> | <b>unknown protein</b> |                 |                 |
| <b>AT1G69890</b> | <b>unknown protein</b> |                 |                 |
| <b>AT2G41640</b> | <b>unknown protein</b> |                 |                 |
| <b>AT4G39670</b> | <b>unknown protein</b> |                 |                 |
| <b>AT5G42050</b> | <b>unknown protein</b> |                 | <b>658</b>      |
| AT1G03730        | unknown protein        |                 | 213, 257        |
| AT1G18470        | unknown protein        |                 | 287             |
| AT1G28380        | unknown protein        |                 |                 |
| AT1G31130        | unknown protein        |                 |                 |
| AT1G36310        | unknown protein        |                 |                 |
| AT1G36580        | unknown protein        | 151             |                 |
| AT1G49480        | unknown protein        |                 |                 |
| AT1G52890        | unknown protein        |                 | 795, 858        |
| AT1G62870        | unknown protein        |                 | 375, 359        |
| AT1G69080        | unknown protein        |                 | 253             |
| AT1G69840        | unknown protein        |                 |                 |
| AT1G72450        | unknown protein        | 904, 941        |                 |
| AT1G74950        | unknown protein        | 255, 860        |                 |
| AT2G01670        | unknown protein        |                 |                 |
| AT2G16530        | unknown protein        |                 |                 |

|           |                      |          |          |
|-----------|----------------------|----------|----------|
| AT2G20240 | unknown protein      |          |          |
| AT2G20810 | unknown protein      |          |          |
| AT2G23810 | unknown protein      | 525      | 387      |
| At2G26190 | unknown protein      |          |          |
| AT3G05320 | unknown protein      |          |          |
| AT3G07180 | unknown protein      | 171      | 155      |
| AT3G07780 | unknown protein      |          | 755      |
| AT3G17650 | unknown protein      | 545      |          |
| AT3G29170 | unknown protein      |          | 311      |
| AT3G56880 | unknown protein      |          | 204, 234 |
| AT3G62680 | proline-rich protein |          |          |
| AT4G21850 | unknown protein      |          |          |
| AT4G24160 | unknown protein      |          | 178      |
| AT4G25030 | unknown protein      | 676      | 793      |
| AT4G32020 | unknown protein      |          | 252      |
| AT4G36500 | unknown protein      |          |          |
| AT5G03210 | unknown protein      | 351      | 175, 539 |
| AT5G09850 | unknown protein      |          |          |
| AT5G18400 | unknown protein      |          | 499      |
| AT5G45350 | unknown protein      |          |          |
| AT5G46500 | unknown protein      |          |          |
| AT5G56980 | unknown protein      | 232      |          |
| AT5G65630 | unknown protein      | 162, 431 |          |
