# Supplementary material
Source: PubMed Central journal article supplement (PMC1626612)
Supplement: plntcell_tpc.106.042713_8.pdf [file plntcell_tpc.106.042713_8.pdf]

## Supplementary Table VI - Classification of calcium-responsive down-regulated genes

| <i>Transcription factors and DNA/RNA related proteins</i> |                                                                            |
|-----------------------------------------------------------|----------------------------------------------------------------------------|
| AT5G59780                                                 | putative transcription factor (MYB59)                                      |
| AT5G65210                                                 | bZIP transcription factor, TGA1                                            |
| AT2G24260                                                 | bHLH transcription factor                                                  |
| AT1G55250                                                 | nuclear zinc finger protein                                                |
| AT1G02780                                                 | 60S ribosomal protein L19                                                  |
| AT5G59870                                                 | histone H2A, putative                                                      |
| <i>Signaling related genes</i>                            |                                                                            |
| <i>kinases</i>                                            |                                                                            |
| AT4G16360                                                 | kinase like protein                                                        |
| <i>others</i>                                             |                                                                            |
| <b>AT2G33830</b>                                          | <b>auxin-regulated protein</b>                                             |
| AT3G51370                                                 | protein phosphatase 2C -related protein                                    |
| AT5G13180                                                 | hypothetical protein SENU5 - senescence up-regulated                       |
| AT3G26740                                                 | light regulated protein                                                    |
| AT3G16460                                                 | jacalin-like lectin - similar to myrosinase binding protein - JA inducible |
| AT3G16420                                                 | jacalin-like lectin - similar to myrosinase binding protein - JA inducible |
| <i>Transporters</i>                                       |                                                                            |
| <b>AT5G47560</b>                                          | <b>sodium-dicarbonic-acid-transporter</b>                                  |
| AT5G43370                                                 | inorganic phosphate transporter (PHT2)                                     |
| <i>aquaporins</i>                                         |                                                                            |
| AT3G61430                                                 | PIP1A - Aquaporin                                                          |
| AT3G53420                                                 | PIP2A - aquaporin                                                          |
| AT3G26520                                                 | GAMMA-TIP2 aquaporin                                                       |
| <i>Defense and PCD related genes</i>                      |                                                                            |
| AT4G26090                                                 | disease resistance protein RPS2 (CC-NBS-LRR class), putative               |
| AT4G11650                                                 | osmotin precursor                                                          |
| AT1G35720                                                 | Ca <sup>2+</sup> -dependent membrane-binding protein annexin               |
| AT5G17820                                                 | peroxidase ATP13a                                                          |
| AT5G64100                                                 | peroxidase ATP3a                                                           |
| AT4G30170                                                 | peroxidase ATP8a                                                           |
| AT2G46750                                                 | FAD-linked oxidoreductase family                                           |
| <i>Proteases</i>                                          |                                                                            |
| <b>AT4G39090</b>                                          | <b>cysteine proteinase RD19A,</b>                                          |
| <b>AT5G43060</b>                                          | <b>cysteine proteinase RD21A</b>                                           |
| <b>AT1G73260</b>                                          | <b>putative trypsin inhibitor</b>                                          |
| AT5G59090                                                 | subtilisin-like serine protease                                            |
| <i>Cellular metabolism and others</i>                     |                                                                            |
| <b>AT5G43450</b>                                          | <b>1-aminocyclopropane-1-carboxylate oxidase</b>                           |
| <b>AT5G23660</b>                                          | <b>nodulin MtN3 family protein</b>                                         |
| <b>AT4G34030</b>                                          | <b>3-METHYLCROTONYL-COA CARBOXYLASE, MCCB</b>                              |
| <b>AT5G49360</b>                                          | <b>glycosyl hydrolase family 3</b>                                         |
| AT5G44020                                                 | vegetative storage protein-related                                         |
| AT1G11580                                                 | pectin methylesterase                                                      |
| AT1G66270                                                 | glycosyl hydrolase family 1, beta-glucosidase                              |
| AT4G16260                                                 | glycosyl hydrolase family 17 - glucan endo-1,3-beta-glucosidase            |

AT1G66200 glutamine synthetase  
AT5G10300 alpha-hydroxynitrile lyase HNL4  
AT3G04445 putative polyribonucleotide phosphorylase  
AT4G14060 major latex protein (MLP)-related  
AT4G37070 similar to patatin-like latex allergen  
AT3G03470 cyp89a9 - cytochrome p450  
AT1G54000 myrosinase-associated protein, putative  
AT2G43150 putative extensin  
AT3G49100 signal recognition particle subunit 9 - like  
AT2G33790 putative proline-rich protein

### **Unknown -21 genes**

AT1G15670 unknown protein  
AT1G21310 unknown protein  
AT1G24040 unknown protein  
AT1G56220 unknown protein  
AT1G62060 unknown protein  
AT1G80440 unknown protein  
AT2G03890 unknown protein  
AT3G15950 unknown protein  
AT3G22280 unknown protein  
AT3G23190 unknown protein  
AT3G27260 unknown protein  
AT3G28550 unknown protein  
AT3G49070 unknown protein  
AT3G51730 unknown protein  
AT3G52060 unknown protein  
AT4G37900 unknown protein  
AT5G26260 unknown protein  
AT5G44610 unknown protein  
AT5G50900 unknown protein  
AT3G26510 octicosapeptide/Phox/Bem1p (PB1) domain-containing protein  
AT4G35750 putative protein similar to E1B 19K Bcl-2-interacting protein Nip2, Homo sapiens
